# Patient reported outcome of adult perioperative anaesthesia in the United Kingdom: a cross-sectional observational study<sup>†</sup>

E. M. K. Walker<sup>1</sup>, M. Bell<sup>2</sup>, T. M. Cook<sup>3</sup>, M. P. W. Grocott<sup>4</sup>, S. R. Moonesinghe<sup>5\*</sup> and Central SNAP-1 Organisation, National Study Groups

<sup>1</sup>National Institute of Academic Anaesthesia Health Services Research Centre, Royal College of Anaesthetists, London, WC1R 4SG, UK, <sup>2</sup>Royal College of Anaesthetists, London, WC1R 4SG, UK, <sup>3</sup>Royal United Hospital NHS Foundation Trust Bath, BA1 3NG, UK, <sup>4</sup>Faculty of Medicine, University of Southampton, Southampton, SO17 1BJ, UK and <sup>5</sup>National Institute of Academic Anaesthesia Health Services Research Centre, Royal College of Anaesthetists, London, WC1R 4SG, UK, and UCL/UCLH Surgical Outcomes Research Centre, Department of Anaesthetics and UCL Centre for Anaesthesia, University College Hospital, London, NW1 2BU, UK

\*Corresponding author. E-mail: rmoonesinghe@rcoa.ac.uk  
Members of the study group are listed in an appendix.

## Abstract

**Background.** Understanding the patient perspective on healthcare is central to the evaluation of quality. This study measured selected patient-reported outcomes after anaesthesia in order to identify targets for research and quality improvement.

**Methods.** This cross-sectional observational study in UK National Health Service hospitals, recruited adults undergoing non-obstetric surgery requiring anaesthesia care over a 48 h period. Within 24 h of surgery, patients completed the Bauer questionnaire (measuring postoperative discomfort and satisfaction with anaesthesia care), and a modified Brice questionnaire to elicit symptoms suggestive of accidental awareness during general anaesthesia (AAGA). Patient, procedural and pharmacological data were recorded to enable exploration of risk factors for these poor outcomes.

**Results.** 257 hospitals in 171 NHS Trusts participated (97% of eligible organisations). Baseline characteristics were collected on 16,222 patients; 15,040 (93%) completed postoperative questionnaires. Anxiety was most frequently cited as the worst aspect of the perioperative experience. Thirty-five per cent of patients reported severe discomfort in at least one domain: thirst (18.5%; 95% CI 17.8–19.1), surgical pain (11.0%; 10.5–11.5) and drowsiness (10.1%; 9.6–10.5) were most common. Despite this, only 5% reported dissatisfaction with any aspect of anaesthesia-related care. Regional anaesthesia was associated with a reduced burden of side-effects. The incidence of reported AAGA was one in 800 general anaesthetics (0.12%)

**Conclusions.** Anxiety and discomfort after surgery are common; despite this, satisfaction with anaesthesia care in the UK is high. The inconsistent relationship between patient-reported outcome, patient experience and patient satisfaction supports using all three of these domains to provide a comprehensive assessment of the quality of anaesthesia care.

**Key words:** anaesthesia; awareness; health care; outcome; patient satisfaction; quality indicators

<sup>†</sup>This Article is accompanied by Editorial Aew384.

**Editor's key points**

- Patient perspectives of anaesthesia care quality were assessed in a large-scale survey of adult patients receiving anaesthesia in the UK National Health Service.
- Questionnaires were completed by 15,040 patients from 257 hospitals over a 48 h period.
- Although 35% of patients reported severe discomfort, only 5% reported dissatisfaction.
- Despite high patient satisfaction with anaesthesia, there are opportunities for quality improvement in patient experience.

Safety, effectiveness and patient-centeredness have been defined as three key domains of healthcare quality,<sup>1,2</sup> and performance metrics may assess any of these. Each year, more than 313 million operations take place globally (approximately 42 procedures per 1000 population),<sup>3</sup> the majority of which are supported by anaesthesia providers. In high-income countries, deaths directly attributable to anaesthesia are rare, and intra-operative mortality in patients undergoing general anaesthesia (GA) is very low.<sup>4</sup> However, anaesthesia is associated with other important adverse outcomes including postoperative complications<sup>5,6</sup> and reduced long-term survival.<sup>7,8,9</sup> Furthermore, many postoperative symptoms – for example, acute surgical pain – are distressing to patients,<sup>10,11</sup> can delay hospital discharge,<sup>12</sup> and can lead to chronic health problems,<sup>13</sup> thereby increasing health and social care costs. Thus, measurement of quality in anaesthesia care provides an opportunity to drive improvement that could affect millions of patients each year and promote healthcare efficiency and productivity.

Patient-reported metrics are increasingly viewed as core quality indicators.<sup>2</sup> Measures specific to anaesthesia encompass the three aforementioned domains of quality: effectiveness, by assessing procedural-related discomfort which anaesthesia providers aim to alleviate (e.g. pain, drowsiness, nausea); patient-centeredness, by measuring patient satisfaction with care delivered; and safety, through estimating the incidence of events that can lead to significant or long-term harm, such as accidental awareness during general anaesthesia (AAGA). Using measures encompassing all three of these domains, we conducted this study to determine the quality of anaesthesia care from the patient perspective in a UK multicentre sample, in order to identify risk factors for these adverse outcomes, characterise the relationship between patient reported outcome and patient satisfaction, identify targets for research and quality improvement, and improve the information given to future patients.

**Methods**

This study is reported in accordance with the “Strengthening the Reporting of Observational Studies in Epidemiology” (STROBE) statement.<sup>14</sup> We undertook a two-day multicentre observational cross-sectional study in the UK National Health Service (NHS). The protocol has been published.<sup>15</sup> Ethics approval was granted by the UK National Research Ethics Service (West Midlands Committee, 14/WM/0043). Hospital and investigator engagement was facilitated through the Quality Audit and Research Coordinator (QuARC) network, which was established by the National Institute of Academic Anaesthesia Health Services Research Centre (NIAA-HSRC) to facilitate health

services research in anaesthesia and perioperative care across the UK. All NHS hospitals were invited to participate. The full investigator list can be found in Appendix 1. Patient recruitment took place between 00:00 on 13<sup>th</sup> May 2014 and 23:59 on 14<sup>th</sup> May 2014. These days of the week were chosen to maximise opportunities for recruitment of patients, outside weekend working hours and potentially busier workloads on Mondays and Fridays. All adults ( $\geq 18$  yr) undergoing a non-obstetric surgical procedure requiring anaesthesia (local, regional or general) or sedation administered by an anaesthetist were eligible for inclusion; all were provided with information about the study before surgery (see Appendix 1).

**Dataset**

The patient report form is presented in the Appendix 1. The anaesthetist responsible for each patient's perioperative care completed patient, personnel and process details at the time of surgery. Operation names were entered using free-text by anaesthetists, and subsequently coded by members of the central study team, using a UK-based objective categorisation of surgical procedure type and magnitude.<sup>16</sup> Patients subsequently completed the Bauer patient satisfaction questionnaire<sup>17</sup> and a Modified Brice Questionnaire for AAGA. The Bauer questionnaire was previously identified<sup>18</sup> as being a psychometrically developed and validated measure of patient satisfaction and discomfort. The modified Brice questionnaire uses closed-questions and was adapted from a previous study.<sup>19</sup> Two further questions were asked: the NHS “Friends and Family Test” (would you recommend this anaesthetic service to friends and family?) and a question regarding whether the patient expected to be asleep during their procedure. Reasons for non-completion of patient questionnaires were noted. Obstetric and paediatric populations were excluded from this study as the Bauer questionnaire had not been validated in these settings.

**Patient involvement**

The Participant Information Sheet was reviewed and amended by a member of the Lay Committee of the Royal College of Anaesthetists; members of the lay committee were also invited to provide feedback on study design and conduct. The Bauer questionnaire was originally developed with patient involvement.

**Analysis**

Continuous variables are presented as mean (SD) when normally distributed and median (range) when not (normality was assessed using the Stata “sktest” for skewness and kurtosis in large sample sizes). Categorical variables are presented as n (%). Patients missing core variables (operation name, all patient characteristic data or any outcome data) were excluded from all analyses. Baseline characteristics between patients who declined or were unable to complete follow-up questionnaires were compared against those who did consent and complete questionnaires. Our co-primary endpoints were the 10 domains of discomfort in the Bauer patient satisfaction questionnaire.

We explored the relationship between patient and process-related factors and a poor outcome in each of the 15 domains of the Bauer questionnaire. For each of the ten markers of anaesthesia-related discomfort, a poor outcome was defined as a response of “severe” on a 3-point Likert scale (none, moderate, severe); for each of the five patient satisfaction questions, a poor outcome was defined by a response of either ‘Dissatisfied’ or ‘Very dissatisfied’ on a 4-point Likert scale.  $\chi^2$  tests were used to

determine the univariate relationship between candidate categorical variables deemed to have plausible associations with poor outcomes in any of these 15 domains;  $\chi^2$  test for trend was used with variable with multiple categories. Variables significant at  $P < 0.1$  were then entered into separate multivariable logistic regression models for poor outcome, in each of the ten discomfort domains (backward-stepwise method), to calculate adjusted Odds Ratios (OR) with 95% Confidence Intervals (CI). Significance for multivariable models was set at  $P < 0.05$ . In multiple regression analyses, we used Bonferroni's correction to adjust for multiple comparisons for different outcomes: 10 comparisons for domains of anaesthesia-related discomfort, and five domains of patient-satisfaction; adjusted  $P$  values are denoted  $P'$ .

A potential case of AAGA was flagged if a patient responded that they remembered something between going to sleep and waking up, or they answered "Awareness" to the question asking them to report the worst thing about their operation. Additionally, all free text responses were screened for responses that could signify AAGA. The local principle investigators for each of these patients were contacted and asked to give their opinion of the likelihood of AAGA for their patients as "probable", "possible", "unlikely" or "un-assessable" according to previously defined criteria,<sup>20</sup> (Appendix 1) and using available local data. Two independent assessors (S.R.M. and T.M.C.) then reviewed each potential AAGA patient and classified them again into one of these four likelihood categories. All patients classed by any of the three reviewers as probable or possible AAGA were then discussed in detail by the two independent assessors and a final classification agreed by consensus.

Data were analysed using STATA/IC 12.1 for Mac (StataCorp LP, College Station TX, USA and Microsoft Excel for Mac 2011, Version 14.4.9 (Microsoft Corporation, Redmond, Washington, USA).

## Results

Patients were recruited from 257 hospitals within 171 English and Scottish NHS Trusts, Welsh Health Boards and

Northern Irish Health and Social Care Trusts – this represented 97% of NHS acute secondary care organisations providing adult services – 146 of 149 in England (98%),<sup>21</sup> 13 of 14 (93%) in Scotland,<sup>22</sup> six of seven (86%) in Wales<sup>23</sup> and five of five (100%) in Northern Ireland.<sup>24</sup> After exclusions, patient characteristics were recorded for 16,222 patients; 15,040 patients answered postoperative questionnaires, giving a response rate of 93% (Fig. 1). Baseline characteristics are shown in Table 1. The commonest reason for non-completion of postoperative questionnaires was that the patient had already been discharged from hospital (388 patients; 2.4%); consent was declined by 310 patients (1.9%) (Appendix 1). Excluding discharged patients, those who did not complete follow-up questionnaires were older and were more likely to have comorbidities or be undergoing urgent or immediate surgery. The median number of patient respondents per hospital was 78 (range 6 – 388). 12,674 (84%) received general anaesthesia. The commonest operations were cystoscopy (782 patients; 5%), cataract surgery (619; 4%) and hernia repair (594; 4%); however, the cohort included 2449 different procedure codes. Data describing perioperative care are summarised in Appendix 1.

### Postoperative discomfort

5230 (34.8%; 95% CI 34.0-35.5%) patients reported severe discomfort in at least one domain. The three most prevalent types of severe discomfort were thirst (18.5%; 95% CI 17.8-19.1), pain at the surgical site (11.0%; 10.5-11.5), and drowsiness (10.1%; 9.6-10.5) (Table 2).

Univariate analyses of risk factors for each domain of severe discomfort are reported in Appendix 1. Independent risk factors for severe discomfort across the ten domains of inquiry are presented in Table 3. Non-modifiable risk factors for severe discomfort included younger age, female sex, obesity, previous stroke or transient ischaemic attack, and long-term opioid or neuropathic pain therapy. Female sex was an independent risk factor for six of the ten adverse outcomes. Independent of other factors, there was a significantly lower prevalence of severe postoperative pain and drowsiness associated with using regional anaesthesia alone (that is, nerve block, spinal or epidural anaesthesia or a combination thereof, without general anaesthesia).

### Patient experience and satisfaction

Patients most commonly reported anxiety to be the worst thing about their operation (33.3%), followed by pain (16.7%). Analysis of free-text responses identified a number of additional themes including the facilities, staff behaviours, communication, and non-clinical processes such as transport or discharge efficiency. (Table 4)

Patient satisfaction levels were high with only 5.7% of patients reporting being dissatisfied or very dissatisfied with any aspect of their care (Table 5). 99% of the patients who responded to the NHS Friends and Family Test (FFT) stated they would recommend the anaesthesia service; 5% did not respond. Two patient or procedural risk factors independently predicted that a patient would not recommend the service to friends or family: long-term opioid use (11% of patients; odds ratio [OR] 1.98, 95% confidence interval [CI] 1.24-3.15;  $P < 0.004$ ), and a history of congestive cardiac failure (2% of patients; OR 2.80, 95% CI 1.29-6.05;  $P < 0.009$ ). Multivariable analysis adjusting for these non-modifiable risk factors found that the following types of severe discomfort predicted that the patient

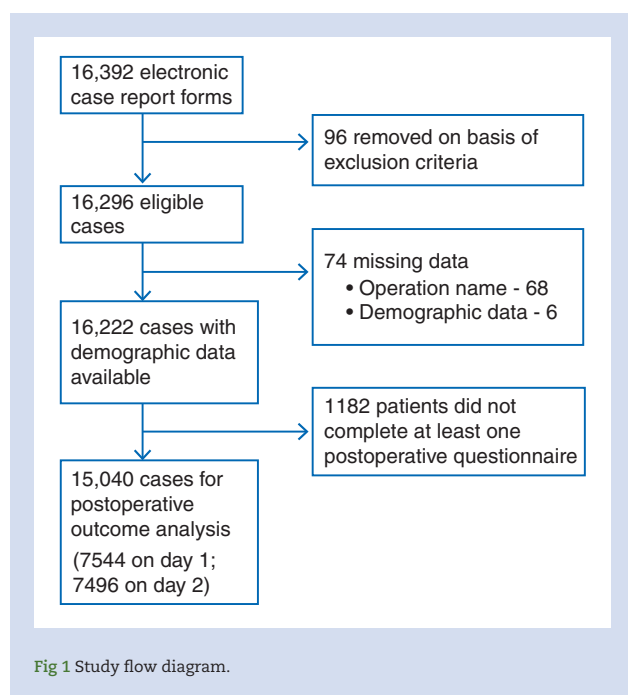

**Table 1** Baseline patient characteristics comparing respondents and non-respondents (n = 16,222) [P values corrected (P') for 20 comparisons between groups of surgical specialty]

| Patient characteristics      | Respondents<br>(n = 15,040) | Non-respondents<br>(n = 1,182) | P value  |
|------------------------------|-----------------------------|--------------------------------|----------|
| Sex (M/F) (% M)              | 6,696/8,344 (45)            | 551/631 (47)                   | 0.163    |
| Age, yr (range)              | 55 (18 – 100)               | 57 (18–98)                     | <0.001   |
| ASA n (%)                    |                             |                                | <0.001   |
| I                            | 4,995 (33)                  | 305 (26)                       |          |
| II                           | 7,208 (48)                  | 450 (38)                       |          |
| III                          | 2,646 (18)                  | 345 (29)                       |          |
| IV                           | 178 (1)                     | 79 (7)                         |          |
| V                            | 3 (0.02)                    | 3 (0.3)                        |          |
| Surgical specialties, n (%)  |                             |                                | P' value |
| Orthopaedics                 | 4,000 (27)                  | 251 (21)                       | <0.002   |
| Gynaecology                  | 1,946 (13)                  | 122 (10)                       | 0.12     |
| Abdomen (gut)                | 1,818 (12)                  | 144 (12)                       | 0.96     |
| Urology                      | 1,802 (12)                  | 143 (12)                       | 0.94     |
| Head and neck                | 1,251 (8)                   | 102 (9)                        | 0.75     |
| Ophthalmology                | 984 (7)                     | 105 (9)                        | 0.04     |
| Body surface (breast)        | 699 (5)                     | 46 (4)                         | 0.26     |
| Abdomen (hepatobiliary)      | 496 (3)                     | 41 (3)                         | 0.99     |
| Body surface (other)         | 438 (3)                     | 28 (2)                         | 0.8      |
| Vascular                     | 352 (2)                     | 27 (2)                         | 0.99     |
| Dental                       | 305 (2)                     | 30 (3)                         | 0.8      |
| Neurosurgery                 | 270 (2)                     | 41 (3)                         | 0.02     |
| Cardiac                      | 251 (2)                     | 53 (4)                         | <0.002   |
| Endoscopy                    | 132 (0.9)                   | 19 (2)                         | <0.004   |
| Thoracic                     | 131 (0.9)                   | 17 (1)                         | 0.18     |
| Endocrine                    | 55 (0.4)                    | 1 (0.08)                       | 0.36     |
| Interventional radiology     | 43 (0.3)                    | 24 (2)                         | <0.002   |
| Abdomen (bariatric)          | 36 (0.2)                    | 3 (0.3)                        | 0.99     |
| Transplant                   | 22 (0.1)                    | 3 (0.3)                        | 0.89     |
| Abdomen (endocrine)          | 9 (0.06)                    | 1 (0.08)                       | 0.74     |
| Surgical urgency, n (%)      |                             |                                | <0.001   |
| Elective                     | 12,008 (80)                 | 809 (69)                       |          |
| Expedited                    | 1,436 (10)                  | 129 (11)                       |          |
| Urgent                       | 1,532 (10)                  | 222 (19)                       |          |
| Immediate                    | 64 (0.4)                    | 22 (2)                         |          |
| Surgical severity, n (%)     |                             |                                | 0.060    |
| Minor                        | 2,550 (17)                  | 161 (14)                       |          |
| Intermediate                 | 5,709 (39)                  | 458 (40)                       |          |
| Major                        | 4,476 (30)                  | 356 (31)                       |          |
| Complex                      | 2,036 (14)                  | 165 (14)                       |          |
| Comorbidities, n (%)         |                             |                                |          |
| Congestive cardiac failure   | 320 (2)                     | 54 (5)                         | <0.001   |
| Previous stroke/TIA          | 572 (4)                     | 84 (7)                         | <0.001   |
| Cancer within past 5 yr      | 1,816 (12)                  | 166 (14)                       | 0.047    |
| Obesity (BMI ≥ 30)           | 3,258 (22)                  | 229 (19)                       | 0.065    |
| Long-term medications, n (%) |                             |                                |          |
| Opiates/opioids              | 1,514 (10)                  | 131 (11)                       | 0.261    |
| NSAIDs/COX inhibitors        | 1,331 (9)                   | 81 (7)                         | 0.019    |
| Benzodiazepines              | 433 (3)                     | 39 (3)                         | 0.405    |
| Neuropathic pain medications | 883 (6)                     | 71 (6)                         | 0.845    |

would not recommend the service to friends and family: pain (OR 2.73, 95% CI (1.81 – 4.13);  $P' < 0.0005$ ) and PONV (OR 3.78, 95% CI 2.11–6.78;  $P' < 0.0005$ ).

### Accidental awareness during general anaesthesia (AAGA)

3.6% (95% CI 3.3–3.9%) of patients undergoing GA were not expecting to be asleep for surgery; conversely, 4.0% (3.7–4.3%) of patients expecting to be asleep were not administered a GA. There was no association between receiving a different type of anaesthetic to that expected, and reporting dissatisfaction with general care, waking or preoperative information sharing; after the review of 338 patients (2.7% of GAs; 95% CI 2.4–2.9%) identified as potential cases of AAGA, 15 patients (0.12% of GAs; 95% CI 0.1–0.2%) were classified as having had either probable (one patient) or possible (14 patients) AAGA, an event rate of approximately 1 in 800. AAGA was related to emergence from anaesthesia (removal of tracheal tube) in six of these patients. One patient reported dissatisfaction with their wake-up from anaesthesia: they experienced pain, being unable to move or breathe and hearing voices during surgery. Two patients reported feeling the surgery but without pain. Regression analysis did not identify any independent risk factors for probable or certain AAGA.

### Discussion

This comprehensive national snapshot of patient-reported outcome shows high levels of satisfaction with anaesthesia care delivered by NHS hospitals. However, there is a striking disconnect between high levels of patient satisfaction and the substantial burden of perioperative symptoms. Severe discomfort in at least one domain was reported by 35% of respondents. The commonest symptom was severe thirst, but this did not predict patient dissatisfaction. Severe pain, drowsiness, sore throat and PONV predicted dissatisfaction with anaesthesia services; however, 99% of patients who responded indicated that they would recommend the service to friends and family. Anxiety and pain were both common and had impact on patient experience, and provide important targets for research and quality improvement. These data can also be used to improve the information provided to patients before surgery and anaesthesia, hence helping to meet and manage patient expectations of their perioperative outcomes and experience. AAGA was uncommon and when it did occur, in only one of 15 patients was it associated with short-term distress or dissatisfaction. Overall, these findings demonstrate the importance of measuring quality from several aspects (safety, experience, outcome) in order to contextualise findings and appropriately focus future efforts to improve care.

The inconsistent relationship we found between satisfaction, safety and effectiveness contradicts the findings of a recent systematic review.<sup>25</sup> There are several possible explanations for this. Our study focused on a particular aspect of hospital treatment – perioperative care evaluated within 24 h of surgery – which has not previously been investigated in a comprehensive multicentre cohort.<sup>18,25</sup> However, our findings are consistent with previous single centre studies in this setting.<sup>17,26</sup> While symptoms such as severe postoperative thirst are common, they may simply be less distressing than those linked with patient dissatisfaction such as pain, nausea and vomiting, or sore throat; it may also be that patients are more prepared for some symptoms than others, through better preoperative communication with healthcare professionals.<sup>27</sup> The discrepancy between the prevalence of different domains of discomfort and their impact on patient satisfaction highlights the importance of measuring both symptoms and experience when



Table 2 Anaesthesia related discomfort [n(%)]

| Anaesthesia-related discomfort | None               | Moderate         | Severe           |
|--------------------------------|--------------------|------------------|------------------|
| <b>Thirst</b>                  |                    |                  |                  |
| Number                         | 4,358              | 7,711            | 2,776            |
| Percentage (95% CI)            | 30.0 (28.3-29.7)   | 51.3 (50.5-52.1) | 18.5 (17.8-19.1) |
| <b>Drowsiness</b>              |                    |                  |                  |
| Number                         | 5,193              | 8,131            | 1,513            |
| Percentage (95% CI)            | 34.5 (33.8 – 35.4) | 54.1 (53.3-54.9) | 10.1 (9.6-10.5)  |
| <b>Pain at surgical site</b>   |                    |                  |                  |
| Number                         | 7,600              | 5,600            | 1,652            |
| Percentage (95% CI)            | 50.5 (49.7-51.3)   | 37.2 (36.5-38.0) | 11.0 (10.5-11.5) |
| <b>Hoarseness</b>              |                    |                  |                  |
| Number                         | 9,769              | 4,418            | 526              |
| Percentage (95% CI)            | 65.0 (64.2-65.7)   | 29.4 (28.7-30.1) | 3.5 (3.2-3.8)    |
| <b>Sore Throat</b>             |                    |                  |                  |
| Number                         | 10,353             | 3,955            | 495              |
| Percentage (95% CI)            | 68.83 (68.1-69.6)  | 26.3 (26.6-27.0) | 3.29 (3.0-3.58)  |
| <b>Cold</b>                    |                    |                  |                  |
| Number                         | 11,333             | 2,859            | 666              |
| Percentage (95% CI)            | 75.4 (74.7-76.0)   | 19.0 (18.4-19.6) | 4.43 (4.1-4.8)   |
| <b>Nausea and vomiting</b>     |                    |                  |                  |
| Number                         | 12,357             | 1,996            | 476              |
| Percentage (95% CI)            | 82.2 (81.6-82.8)   | 13.3 (12.7-13.8) | 3.2 (2.9-3.4)    |
| <b>Confusion</b>               |                    |                  |                  |
| Number                         | 12,409             | 2,174            | 189              |
| Percentage (95% CI)            | 82.5 (82.0-83.1)   | 14.5 (13.9-15.0) | 1.3 (1.1-1.4)    |
| <b>Shivering</b>               |                    |                  |                  |
| Number                         | 12,782             | 1,635            | 410              |
| Percentage (95% CI)            | 85.0 (84.4-85.6)   | 10.9 (10.4-11.4) | 2.7 (2.5-3.0)    |
| <b>Pain at injection site</b>  |                    |                  |                  |
| Number                         | 12,856             | 1,734            | 194              |
| Percentage (95% CI)            | 85.5 (84.9-86.0)   | 11.5 (11.0-12.0) | 1.3 (1.1-1.5)    |

evaluating patient-centred outcomes for the purposes of quality improvement. It is notable that most patients who were categorised as potential AAGA patients did not report dissatisfaction with the care delivered. This may be because our estimate was inaccurate, because a low event rate meant that we missed a significant relationship between AAGA and other risk factors or outcomes, because the distressing consequences of AAGA may not become apparent until much later,<sup>28</sup> or because dissatisfaction after an episode of AAGA is more likely to be associated with the manner in which complaints or concerns are later handled than with the event of AAGA itself.<sup>29</sup>

Analyses identifying risk factors for adverse outcomes should be interpreted with the same caution as in all observational studies. Our data are hypothesis-generating rather than explanatory, and confounding by indication could be responsible for some reported associations – for example between administration of morphine and severe postoperative pain.<sup>30</sup> Acknowledging these caveats, our findings nevertheless point towards opportunities for future research and improvement efforts. Low-risk interventions such as music therapy, which has been shown to reduce perioperative anxiety and pain,<sup>31</sup> might improve experience for substantial numbers of patients without incurring major cost. The most common type of postoperative discomfort reported was thirst; this could be locally investigated through evaluation of preoperative starvation times, intraoperative fluid and drug regimens and possibly addressed through rapid re-establishment of oral fluids after

surgery where possible.<sup>32</sup> More than half of patients reported severe or moderate surgical pain: this is a particularly important target for research and quality improvement, as improving acute pain management might also reduce the risk of chronic pain,<sup>13</sup> which is both distressing for patients and carries significant societal burden.<sup>33</sup> Furthermore, this has recently been highlighted as a research priority by patients, public and health-care professionals in the UK.<sup>34</sup> Although the incidence of suspected AAGA in this cohort is consistent with studies using similar methods to elicit explicit recall of intraoperative events,<sup>35</sup> in nearly half of these patients, the episode of awareness occurred during removal of a tracheal tube. However, recent reports have highlighted late psychological harm as a result of awareness during emergence from anaesthesia,<sup>28</sup> hence we have included these patients in our estimate of AAGA incidence, where older studies have not.<sup>36</sup>

The major strength of this study is the size and distribution of the sample. 97% of eligible NHS organisations contributed data, and the patient response rate was high. This comprehensive hospital participation is unusual compared with previous large-scale point-prevalence studies.<sup>37,38</sup> Professional engagement was facilitated by establishing a network of investigators to support research and quality improvement; furthermore, and following the example set by surgical trainee research networks,<sup>39</sup> junior doctors and students were encouraged to become investigators for this study, hence supporting study delivery at a local level. This networked approach to health

**Table 3** Factors independently (on multivariable analysis) associated with severe postoperative discomfort. Odds ratios (95% CI);  $P < 0.01$  unless otherwise stated [ $P = P$  corrected for 10 comparisons using Bonferroni's correction]

| Risk factor                                                        | Thirst           | Pain at surgical site | Drowsiness       | Hoarseness | Sore throat      | Cold             | PONV             | Confusion        | Shivering        | Pain at injection site |
|--------------------------------------------------------------------|------------------|-----------------------|------------------|------------|------------------|------------------|------------------|------------------|------------------|------------------------|
| <b>NON-MODIFIABLE FACTORS</b>                                      |                  |                       |                  |            |                  |                  |                  |                  |                  |                        |
| Female sex                                                         | 1.32 (1.22-1.45) | 1.73 (1.55-1.96)      | 1.70 (1.51-1.91) |            | 1.52 (1.25-1.84) | 2.69 (2.24-3.23) | 2.77 (2.22-3.45) |                  | 0.68 (0.52-0.88) |                        |
| BMI > 30                                                           |                  |                       |                  |            |                  | 0.58 (0.47-0.72) | 1.41 (1.15-1.72) |                  | $P = 0.04$       |                        |
| Age 18-65                                                          |                  | 1.27 (1.12-1.43)      | 1.25 (1.10-1.41) |            |                  | 1.40 (1.17-1.68) | 1.57 (1.27-1.94) |                  | 1.95 (1.53-2.49) |                        |
| Age ≥ 80                                                           |                  |                       | $P = 0.01$       |            |                  |                  |                  |                  |                  |                        |
| Previous TIA/CVA                                                   | 0.76 (0.63-0.90) |                       |                  |            |                  | 1.69 (1.17-2.44) |                  |                  |                  |                        |
|                                                                    |                  |                       |                  |            |                  | $P = 0.05$       |                  |                  |                  |                        |
| Long-term opioids                                                  |                  |                       |                  |            |                  | 1.48 (1.17-1.88) |                  |                  | 1.52 (1.14-2.04) |                        |
|                                                                    |                  |                       |                  |            |                  | $P = 0.01$       |                  |                  | $P = 0.04$       |                        |
| Long-term neuropathic agents                                       | 1.48 (1.25-1.74) |                       |                  |            |                  |                  |                  |                  |                  |                        |
| ASA grade [Reference: ASA grade I]                                 |                  |                       |                  |            |                  |                  |                  |                  |                  |                        |
| III                                                                | 1.43 (1.25-1.63) |                       |                  |            |                  |                  |                  |                  |                  |                        |
| IV or V                                                            | 2.65 (1.89-3.71) |                       |                  |            |                  |                  |                  |                  |                  |                        |
| Urgent/immediate surgery                                           | 1.22 (1.07-1.39) | 1.35 (1.16-1.59)      | 1.35 (1.15-1.58) |            |                  |                  |                  | 3.49 (2.50-4.81) |                  |                        |
| Surgical type                                                      |                  |                       |                  |            |                  |                  |                  |                  |                  |                        |
| Neurosurgery                                                       | 0.61 (0.45-0.83) |                       |                  |            |                  |                  |                  |                  |                  |                        |
|                                                                    | $P = 0.01$       |                       |                  |            |                  |                  |                  |                  |                  |                        |
| Urology                                                            | 0.70 (0.59-0.81) | 0.69 (0.55-0.87)      | 0.66 (0.53-0.82) |            |                  |                  |                  |                  |                  |                        |
|                                                                    | 0.47 (0.30-0.75) |                       |                  |            |                  |                  |                  |                  |                  |                        |
|                                                                    | $P = 0.01$       |                       |                  |            |                  |                  |                  |                  |                  |                        |
| Ophthalmology                                                      | 0.45 (0.34-0.59) |                       |                  |            |                  |                  |                  |                  |                  |                        |
| Cardiac                                                            |                  |                       |                  |            |                  |                  |                  |                  |                  |                        |
| Head and Neck                                                      |                  | 2.01 (1.45-2.80)      | 2.14 (1.53-3.01) |            | 1.85 (1.44-2.38) |                  |                  |                  |                  |                        |
|                                                                    |                  |                       |                  |            | $P = 0.01$       |                  |                  |                  |                  |                        |
| Thoracic                                                           |                  |                       |                  |            | 3.38 (1.84-6.19) |                  |                  |                  |                  |                        |
| Magnitude of surgery [Reference variable: minor surgery]           |                  |                       |                  |            |                  |                  |                  |                  |                  |                        |
| Major                                                              |                  |                       |                  |            |                  |                  |                  | 2.75 (1.46-5.16) |                  |                        |
|                                                                    |                  |                       |                  |            |                  |                  |                  | $P = 0.02$       |                  |                        |
| Complex                                                            |                  |                       |                  |            |                  |                  |                  | 3.33 (1.69-6.55) |                  |                        |
|                                                                    |                  |                       |                  |            |                  |                  |                  | $P = 0.01$       |                  |                        |
| Major or complex surgery                                           | 1                |                       |                  |            |                  |                  |                  |                  | 1.47 (1.20-1.81) |                        |
|                                                                    |                  |                       |                  |            |                  |                  |                  |                  |                  |                        |
| Duration of surgery [Reference variable: <30min(m)]                |                  |                       |                  |            |                  |                  |                  |                  |                  |                        |
| 30-60m                                                             | 1.26 (1.10-1.43) | 1.68 (1.40-2.00)      | 1.54 (1.30-1.84) |            |                  |                  |                  |                  |                  |                        |
| 60-120m                                                            | 1.31 (1.13-1.52) | 2.63 (2.18-3.15)      | 2.47 (2.07-2.94) |            |                  |                  |                  |                  |                  |                        |
| >120m                                                              | 1.66 (1.40-1.98) | 3.18 (2.58-3.92)      | 3.06 (2.52-3.70) |            |                  |                  |                  |                  |                  |                        |
| MODIFIABLE FACTORS                                                 |                  |                       |                  |            |                  |                  |                  |                  |                  |                        |
| Anaesthetic technique                                              |                  |                       |                  |            |                  |                  |                  |                  |                  |                        |
| Inhalation GA                                                      |                  |                       |                  |            |                  |                  |                  |                  |                  |                        |
| Total i.v. GA                                                      | 1.42 (1.25-1.61) |                       |                  |            |                  |                  |                  |                  |                  |                        |
|                                                                    |                  |                       |                  |            |                  |                  |                  |                  |                  |                        |
| Sole RA without GA                                                 |                  | 0.27 (0.19-0.37)      |                  |            |                  |                  |                  |                  |                  |                        |
| Pharmacological agents administered during anaesthesia and surgery |                  |                       |                  |            |                  |                  |                  |                  |                  |                        |
| Neuromuscular block                                                | 1.85 (1.68-2.04) |                       |                  |            |                  |                  |                  |                  |                  |                        |
| Morphine                                                           | 1.20 (1.09-1.32) | 1.44 (1.28-1.63)      | 1.46 (1.31-1.66) |            | 2.96 (2.41-3.64) |                  |                  |                  | 0.71 (0.57-0.90) |                        |
|                                                                    |                  |                       |                  |            |                  |                  |                  |                  | $P = 0.05$       |                        |
| Alfentanil                                                         |                  |                       |                  |            |                  |                  |                  |                  | 0.50 (0.31-0.80) |                        |
|                                                                    |                  |                       |                  |            |                  |                  |                  |                  | $P = 0.04$       |                        |
| Cyclizine                                                          |                  |                       |                  |            |                  |                  |                  |                  |                  |                        |
|                                                                    |                  |                       |                  |            |                  |                  |                  |                  |                  |                        |

**Table 4** Responses to the question: "What was the worst thing about your operation?" (total responses: n = 13,985)

| Response                                                              | Number of patients | Percentage | 95% CI    |
|-----------------------------------------------------------------------|--------------------|------------|-----------|
| Anxiety                                                               | 4,653              | 33.3       | 32.3-34.1 |
| Pain                                                                  | 2,333              | 16.7       | 16.1-17.3 |
| Unable to carry out usual activities                                  | 1,785              | 12.8       | 12.2-13.3 |
| Recovery process                                                      | 920                | 6.6        | 6.2-7.0   |
| Awareness                                                             | 136                | 1.0        | 0.8-1.1   |
| Nothing                                                               | 2,034              | 14.5       | 14.0-15.1 |
| Other (thematic analysis)                                             | 2,124              | 15.6       | 14.6-15.8 |
| • Environment/facilities (waiting times/recovery)                     |                    |            |           |
| • Emotional wellbeing (anticipation/anxiety/circumstances of surgery) |                    |            |           |
| • Procedure specifics (cannulation/regional)                          |                    |            |           |
| • Symptoms (hunger, thirst, cold, pain)                               |                    |            |           |
| • Staff (professionalism/quality of care)                             |                    |            |           |
| • Communication (changes to planned surgery/pre-op discussion)        |                    |            |           |
| • Process (transport, discharge)                                      |                    |            |           |

**Table 5** Satisfaction with care

| Domain                                | Very Satisfied | Satisfied   | Dissatisfied | Very dissatisfied | Not applicable |
|---------------------------------------|----------------|-------------|--------------|-------------------|----------------|
| Pain therapy (n = 14,403)             | 8,879          | 4,986       | 414          | 108               | 16             |
| Number                                | 61.6           | 34.6        | 2.9          | 0.8               | 0.1            |
| Percentage (95% CI)                   | (60.9-62.4)    | (33.8-35.4) | (2.6-3.1)    | (0.6-0.9)         |                |
| PONV therapy (n = 12,161)             | 8,652          | 3,271       | 117          | 33                | 88             |
| Number                                | 71.1           | 26.9        | 0.8          | 0.3               | 0.7            |
| Percentage (95% CI)                   | (70.3-71.9)    | (26.1-27.7) | (0.7-1.0)    | (0.2-0.4)         |                |
| Preoperative information (n = 14,943) | 12,458         | 2,373       | 58           | 52                | 2              |
| Number                                | 83.4           | 15.9        | 0.4          | 0.4               | 0.01           |
| Percentage (95% CI)                   | (82.7-84.0)    | (15.2-16.5) | (0.3-0.5)    | (0.3-0.5)         |                |
| Waking up (n = 14,092)                | 9,416 (67)     | 4,360       | 194          | 78                | 44             |
| Number                                | 66.8           | 31.0        | 1.4          | 0.6               | 0.3            |
| Percentage (95% CI)                   | (66.0-68.7)    | (30.1-31.8) | (1.2-1.6)    | (0.4-0.7)         |                |
| General care (n = 14,922)             | 12,773         | 2,065       | 31           | 51                | 2              |
| Number                                | 85.6           | 13.8        | 0.2          | 0.3               | 0.013          |
| Percentage (95% CI)                   | (85.0-86.2)    | (13.8-14.5) | (0.1-0.3)    | (0.2-0.4)         |                |

services research delivery provides a useful template that might be replicated in other settings. There are, however, some limitations. Although comparison with previous NHS activity data<sup>4</sup> indicates that we have captured nearly all eligible patients during our recruitment window, a relatively small proportion of procedures (10%) were classified as either urgent or immediate, and non-respondents were also higher risk in terms of comorbidities and age: this is likely to reflect recruitment bias, and could have affected our findings. It is possible that we did not capture all patient or process-related risk factors for adverse outcomes: these are potential additional sources of confounding in our analyses. We did not include ethnicity in our dataset; other studies have found variation in patient satisfaction<sup>40</sup> or patient expectation<sup>41</sup> according to ethnicity. This might also be an important issue when considering the international

generalizability of our findings. Finally, our methodology for determining whether patients experienced AAGA had limitations. It was clear from follow-up that for some patients, the term "awareness" carried a different meaning to that intended. This provides some explanation for the high false positive rate for the modified Brice questionnaire, and might indicate that its specificity is too poor to be used in routine clinical practice. We did not conduct three administrations of the Brice questionnaire as would normally be recommended; nor did we specify the method of follow-up of suspected AAGA patients by local investigators. These factors might have led to inaccuracy in our estimate of AAGA incidence.

In summary, we calculated a robust multicentre evaluation of patient perspectives on anaesthesia care in NHS hospitals. We found that while patient satisfaction was high, one in three

patients reported severe discomfort within 24 h of surgery. Anxiety was most commonly reported as the worst aspect of the surgical episode: this finding supports wider implementation and evaluation of simple, cost-effective, evidence-based anxiolytic interventions. Routinely reported quality data should cover all three aspects of safety, experience and outcome, so as to provide a comprehensive assessment of care from the patient perspective. International replication of our methodology would provide data supporting improved performance and outcome in different healthcare settings, and enable comparisons that might further elucidate the role of organisational and cultural factors on patients' perspective of quality in anaesthesia care.

### Authors' contributions

Study design/planning: S.R.M., E.M.K.W., M.B.

Study conduct: S.R.M., E.M.K.W., M.B.

Data analysis: S.R.M., E.M.K.W., M.P.W.G., T.M.C.

Writing paper: S.R.M., E.M.K.W.

Revising paper: all authors

### Acknowledgements

We are grateful to our collaborators, the SNAP-1 investigators; the full list of contributors can be found in Appendix 1.

### Declaration of interest

All authors have completed the ICMJE uniform disclosure at <http://icmje.org/conflicts-of-interest/> and declare: financial support for the submitted work from the National Institute for Academic Anaesthesia (NIAA; Royal College of Anaesthetists), University College London Hospitals (UCLH) NHS Foundation Trust and UCLH National Institute for Health Research Biomedical Research Centre. In addition, S.R.M. has received other unrelated research grants from the NIAA, the UCLH NIHR Biomedical Research Centre and the Health Foundation. S.R.M. (since May 2016) is the Associate National Director for Elective Care for NHS England. E.M.K.W. received salary support from the London Clinic Intensive Care Unit while analysing this study. M.P.W.G. receives funding from the Southampton NIHR Biomedical Research Unit (Respiratory). There are no other relationships or activities that could appear to have influenced the submitted work.

### Funding

National Institute for Academic Anaesthesia (Royal College of Anaesthetists), University College London Hospitals (UCLH) NHS Foundation Trust and NIHR Biomedical Research Centre at University College London Hospitals NHS Foundation Trust and University College London. The funders have had no role in the conduct, analysis or reporting of the results.

### References

1. Institute of Medicine. *Crossing the Quality Chasm: A New Health System for the 21st Century*. Washington D.C., U.S.: National Academy Press, 2001
2. Darzi A. *High Quality Care For All: NHS Next Stage Review final report*. London, UK: The Stationery Office, Department of Health, 2008b. Available from [https://www.gov.uk/government/uploads/system/uploads/attachment\\_data/file/228836/7432.pdf](https://www.gov.uk/government/uploads/system/uploads/attachment_data/file/228836/7432.pdf) (accessed 10 November 2015)
3. Weiser TG, Haynes AB, Molina G, et al. Estimate of the global volume of surgery in 2012: an assessment supporting improved health outcomes. *Lancet* 2015; **385**: S11
4. Sury MRJ, Palmer Jhmg Cook TM, Pandit JJ. The State of UK anaesthesia: a survey of National Health Service activity in 2013. *Br J Anaesth* 2014; **113**: 575–84
5. Pearse RM, Harrison DA, MacDonald N, et al. Effect of a perioperative, cardiac output-guided hemodynamic therapy algorithm on outcomes following major gastrointestinal surgery: a randomized clinical trial and systematic review. *JAMA* 2014; **311**: 2181–90
6. Rigg JR, Jamrozik K, Myles PS, et al. Epidural anaesthesia and analgesia and outcome of major surgery: a randomised trial. *Lancet* 2002; **359**: 1276–82
7. Moonesinghe SR, Harris S, Mythen MG, et al. Survival after postoperative morbidity: a longitudinal observational cohort study. *Br J Anaesth* 2014; **113**: 977–84
8. Rhodes A, Cecconi M, Hamilton M, et al. Goal-directed therapy in high-risk surgical patients: a 15-year follow-up study. *Intensive Care Med* 2010; **36**: 1327–32
9. Wigmore TJ, Mohammed K, Jhanji S. Long-term survival for patients undergoing volatile versus IV anaesthesia for cancer surgery: a retrospective analysis. *Anesthesiology* 2016; **124**: 69–79
10. Macario A, Weinger M, Truong P, Lee M. Which clinical anaesthesia outcomes are both common and important to avoid? The perspective of a panel of expert anesthesiologists. *Anesth Analg* 1999; **88**: 1085–91
11. Macario A, Weinger M, Carney S, Kim A. Which clinical anaesthesia outcomes are important to avoid? The perspective of patients. *Anesth Analg* 1999; **89**: 652–8
12. Grocott MP, Browne JP, Van der Meulen J, et al. The Postoperative Morbidity Survey was validated and used to describe morbidity after major surgery. *J Clin Epidemiol* 2007; **60**: 919–28
13. Kehlet H, Jensen TS, Woolf CJ. Persistent postsurgical pain: risk factors and prevention. *Lancet* 2006; **367**: 1618–25
14. von Elm E, Altman DG, Egger M, Pocock SJ, Gotsche PC, Vandenbroucke JP. The Strengthening of Reporting of Observational Studies in Epidemiology (STROBE) statement: guidelines for reporting observational studies. *J Clin Epidemiol* 2008; **61**: 344–9
15. Moonesinghe SR, Walker EM, Bell M. Design and methodology of SNAP-1: a Sprint National Anaesthesia Project to measure patient reported outcome after anaesthesia. *Perioper Med (Lond)* 2015; **4**: 4 doi: 10.1186/s13741-015-0011-2. eCollection 2015
16. AXA-PPP Healthcare. Schedule of Procedures and Fees for Fee Approved Specialists. 2015. Available from <https://online.axapphealthcare.co.uk/SpecialistForms/SpecialistCode.mvc?source=contracted> (accessed 10 November 2015)
17. Bauer M, Bohrer H, Aichele G, Bach A, Martin E. Measuring patient satisfaction with anaesthesia: perioperative questionnaire versus standardised face-to-face interview. *Acta Anaesthesiologica Scandinavica* 2001; **45**: 65–72
18. Barnett SF, Alagar RK, Grocott MP, Giannaris S, Dick JR, Moonesinghe SR. Patient-satisfaction measures in anaesthesia: qualitative systematic review. *Anesthesiology* 2013; **119**: 452–78
19. Avidan MS, Jacobsohn E, Glick D, et al. Prevention of intraoperative awareness in a high-risk surgical population. *N Engl J Med* 2011; **365**: 591–600



20. Pandit JJ, Andrade J, Bogod DG, et al. 5th National Audit Project (NAP5) on accidental awareness during general anaesthesia: protocol, methods, and analysis of data. *Br J Anaesth* 2014; **113**: 540–8
21. NHS Confederation. Key statistics on the NHS. 2016. Available from <http://www.nhsconfed.org/resources/key-statistics-on-the-nhs> (accessed 1 July 2016)
22. The Scottish Government. Structure of NHS Scotland. 2016. Available from <http://www.gov.scot/Topics/Health/About/NHS-Scotland> (accessed 1 July 2016)
23. NHS Wales. Health in Wales. 2016. Available from <http://www.wales.nhs.uk/nhs-wales/about-us/structure> (accessed 1 July 2016)
24. Health and Social Care Online, Health and Social Care Trusts. 2015. Available from <http://online.hscni.net/hospitals/health-and-social-care-trusts/> (accessed 1 July 2016)
25. Doyle C, Lennox L, Bell D. A systematic review of evidence on the links between patient experience and clinical safety and effectiveness. *Br Med J Open* 2013; **3**: e001570. doi: 10.1136/bmjopen-2012-001570
26. Myles PS, Williams DL, Hendrata M, Anderson H, Weeks AM. Patient satisfaction after anaesthesia and surgery: results of a prospective survey of 10,811 patients. *Br J Anaesth* 2000; **84**: 6–10
27. Hamilton DF, Lane JV, Gaston P, et al. What determines patient satisfaction with surgery? A prospective cohort study of 4709 patients following total joint replacement. *Br Med J Open* 2013; **3**: e001570 doi: 10.1136/bmjopen-2012-001570.
28. Pandit JJ, Andrade J, Bogod DG, et al. 5th National Audit Project (NAP5) on accidental awareness during general anaesthesia: summary of main findings and risk factors. *Br J Anaesth* 2014; **113**: 549–59
29. Kent CD, Posner KL, Mashour GA, et al. Patient perspectives on intraoperative awareness with explicit recall: report from a North American anaesthesia awareness registry. *Br J Anaesth* 2015; **115**: i114–21
30. Signorello LB, McLaughlin JK, Lipworth L, Friis S, Sorensen HT, Blot WJ. Confounding by indication in epidemiologic studies of commonly used analgesics. *Am J Ther* 2002; **9**: 199–205
31. Hole J, Hirsch M, Ball E, Meads C. Music as an aid for postoperative recovery in adults: a systematic review and meta-analysis. *Lancet* 2015; **386**: 1659–71
32. Levy N, Mills P, Mythen M. Is the pursuit of DREAMing (drinking, eating and mobilising) the ultimate goal of anaesthesia? *Anaesthesia* 2016; **71**: 1008–12
33. Breivik H, Eisenberg E, O'Brien T. The individual and societal burden of chronic pain in Europe: the case for strategic prioritisation and action to improve knowledge and availability of appropriate care. *BMC Public Health* 2013; **13**: 1229
34. Boney O, Bell M, Bell N, et al. Identifying research priorities in anaesthesia and perioperative care: final report of the joint National Institute of Academic Anaesthesia/James Lind Alliance Research Priority Setting Partnership. *Br Med J Open* 2015; **5**: e010006 doi: 10.1136/bmjopen-2015-010006.
35. Sandin RH, Enlund G, Samuelsson P, Lennmarken C. Awareness during anaesthesia: a prospective case study. *Lancet* 2000; **355**: 707–11
36. Myles PS, Leslie K, McNeil J, Forbes A, Chan MT. Bispectral index monitoring to prevent awareness during anaesthesia: the B-Aware randomised controlled trial. *Lancet* 2004; **363**: 1757–63
37. Magill SS, Edwards JR, Bamberg W, et al. Multistate point-prevalence survey of health care-associated infections. *N Engl J Med* 2014; **370**: 1198–208
38. Pearse RM, Moreno RP, Bauer P, et al. Mortality after surgery in Europe: a 7 day cohort study. *Lancet* 2012; **380**: 1059–65
39. Pinkney TD, Calvert M, Bartlett DC, et al. Impact of wound edge protection devices on surgical site infection after laparotomy: multicentre randomised controlled trial (ROSSINI Trial). *Br Med J* 2013; **347**: f4305
40. Woods SE, Bivins R, Oteng K, Engel A. The influence of ethnicity on patient satisfaction. *Ethn Health* 2005; **10**: 235–42
41. Mead N, Roland M. Understanding why some ethnic minority patients evaluate medical care more negatively than white patients: a cross sectional analysis of a routine patient survey in English general practices. *Br Med J* 2009; **339**: b3450

## Appendix 1

### Central SNAP-1 Organisation

#### Chief Investigator

S Ramani Moonesinghe

#### Trainee Lead Investigator

Eleanor MK Walker

#### Study Coordinator

Madeline R Bell

#### National Institute of Academic Anaesthesia

Sharon Drake  
Mary Casserly  
Dimitri Papadimitriou  
Jose Lourtie  
Martin Leuwer

#### National Institute of Academic Anaesthesia's Health Services Research Centre

Michael PW Grocott  
Jonathan Benn  
Timothy M Cook  
Dave Murray  
Charles Matthew Oliver  
Rupert M Pearse  
David Saunders  
Annie Simpson

#### UCL/UCLH Surgical Outcomes Research Centre

Oliver Boney  
Sarah Barnett  
Michael Galsworthy  
Michael G Mythen

#### Net Solving Ltd

Martin Cripps  
Paul Cripps

#### Rayzume Ltd

Jon Fuller

#### Research and Audit Federation for Trainees

Thomas Clark<sup>g</sup>  
Benjamin Harris<sup>e</sup>  
Charlotte Small<sup>i</sup>  
Jason Lie<sup>c</sup>

### National Study Groups

<sup>\*</sup>indicates Local Lead Investigator for a Trust / Health Board

#### Trainee Research Networks

<sup>a</sup>indicates membership of AARMY

(Anaesthetic Audit and Research Matrix of Yorkshire)

<sup>b</sup>indicates membership of INCARN.NET

(Intensive Care and Anaesthesia Research Network North East Trainees)

<sup>c</sup>indicates membership of NWRAG

(North-West Research and Audit Group)

<sup>d</sup>indicates membership of SHARC

(South Yorkshire Hospitals Audit and Research Collaborative)

<sup>e</sup>indicates membership of SPARC

(South coast Perioperative Audit and Research Collaborative)

<sup>f</sup>indicates membership of STAR

(Severn Trainees Anaesthetic Research group)

<sup>g</sup>indicates membership of SWARM

(South West Anaesthesia Research Matrix)

<sup>h</sup>indicates membership of WAAREN

(Welsh Anaesthesia Audit and Research Engagement Network)

<sup>i</sup>indicates membership of WM TRAIN

(West Midlands Trainee Research in Anaesthesia and Intensive care Network)

### Northern Ireland

Belfast Health and Social Care Trust  
Mona Behraves  
Joanne Colgan\*  
Eva Corcoran  
Samuel Dawson  
Andrew Eggleton  
Grainne Fitzpatrick  
Denver Glasgow  
Mary Clare Kelly\*  
Barbara MacAfee  
Killian McCourt\*  
Claire Montgomery  
Alexandra Murphy  
Gareth Paul  
James Quinn  
Lloyd Turbitt  
Alison White  
Callum Wilson\*

### Northern Health and Social Care Trust

David Johnston  
Kumar Manmadha Kada-Venkata\*  
Helen Lindsay  
Geoffrey Wright\*

### Western Health and Social Care Trust

Vinanti Cherian\*  
William Holmes  
Nauman Iftikhar  
Eireann Kerr  
Muhammad Usman Latif\*  
Madalina McCrea  
Karen Orr  
Paula Claire Pyper

### South Eastern Health and Social Care Trust

Paul Foley\*  
Lori Lindsay  
Simon Marcus  
Helen Murray

Nicola Wallace

### Southern Health and Social Care Trust

Patricia Anagnostides  
Rebecca Barr  
Gail Browne\*  
Lisa Clarke  
Rachel Copeland

### Scotland

#### NHS Ayrshire & Arran

Andrew Clark  
Susan Livingstone  
Michael McLaughlin  
Joellene Mitchell\*  
Peter O'Brien\*  
Ker Wei Tan

#### NHS Dumfries & Galloway

Alexander Arthur  
Naomi Cassells  
Vivien Edwards\*  
Benjamin Vowles

#### NHS Fife

Linsey Burd  
Simon Chillingworth  
Sarah Fadden  
Rachel Gill  
Katie Hunter\*  
Savini Wijesingha

#### NHS Forth Valley

Deirdre Conway  
Stephen Hickey  
Yuvaraj Kummur  
Srikanth Lakshminarayan  
Reza Noori  
Monojit Paul  
Azfer Usmani\*

#### NHS Grampian

Adriana Botello  
Jill Davidson  
Bianca Ebtehadj  
Callum Kaye  
Naveen Kirodian  
R Nanda Kumar  
Andrew Laurie  
Amr Mahdy\*  
Aimee Meechan  
Bahadur Niazi  
Louise Peet

#### NHS Greater Glasgow & Clyde

Ravi Agaram  
Rajib Ahmed  
Thomas Ballantyne

Julie Campbell  
Anna Cormack  
Richard Cowan  
Barbara A. Crooks\*  
Rachel Darling  
John Dolan  
Nicola Doody  
Rachel Fulton  
Michael Gardner  
Adam Glass  
Stuart Hannah  
Roderick Hamilton\*  
Johann Harten\*  
Sue Hutton  
Rebecca Jadhav  
Kenneth James  
Kerry Litchfield  
Adam Livingston  
Katherine Livingstone  
Eilidh MacDonald  
Naomi May  
Myra McAdam  
Elizabeth McGrady  
Rhys Millington  
Dalia Mitra  
Jane Morrison  
Helen Rhodes  
Emma Rhodes  
Drew Smith  
Manfred Staber\*  
Vanessa Vallance  
Daphne Varveris\*  
Douglas Walker\*  
Louise Welsh  
Simon Young

#### NHS Highland

Jayne Halcrow  
Jacqueline Howes\*  
Emily Robertson  
David Robinson\*

#### NHS Lanarkshire

Ali Atrah  
Roddy Chapman\*  
Jonathan Edgar\*  
Juan Escuder\*  
Sumit Gajree  
Keith Hodgson  
Chris Lochrin  
Christopher Love  
Naveeta Maini  
Mark Mifsud  
Ayman Mustafa  
Khaled Razouk\*  
Jose Soriano  
Dominic Strachan  
Tamas Szelei  
Ruth Taggart

#### NHS Lothian

R Peter Alston\*

Mohammad Zeshan Bhatti  
 Ellie Cox  
 Vanessa Humphrey  
 Faisal Jafar  
 Keith Kelly  
 Evangelia Matiaki  
 Stuart McLellan  
 John McLenachan  
 Laura McRae  
 Martin Slattery  
 Catriona Williamson

### **NHS Orkney**

Paul Cooper\*  
NHS Shetland  
 Catriona Barr\*  
 Keh Wei Kong  
NHS Tayside  
 Elizabeth Broadbent  
 Natalie Clark  
 May Mok\*  
 Shirley Moore

### **NWTCB Golden Jubilee National Hospital**

Stefan Schraag\*  
 Firas Abu-Eishe  
 Bhushan Joshi  
 Isma Quasim

### **Wales**

#### **Abertawe Bro Morgannwg University Health Board**

Paul Carter  
 Benjamin O Donovan  
 Benjamin Eagle  
 James Farrant<sup>h</sup>  
 Maryna Garmash  
 Jishar Abdul Kader  
 Bethan Morris  
 Shilpa Rawat\*  
 Robin Spacie  
 Ramakrishna Suresha  
 Gareth Taylor  
 Thomas White  
 Viju Varadarajan\*  
Aneurin Bevan Health Board  
 Timothy Alce  
 Lowri Bowen  
 Kevin Draper<sup>h</sup>  
 Rebecca Jackson  
 Karen Meacher  
 Samuel Thomas Meinrad Sheppard  
 Thomas Morgan-Jones\*  
 James Tozer\*

#### **Betsi Cadwaladr University Health Board**

Justine Angrave  
 Craig Beaton<sup>h</sup>  
 Gillian Bennett  
 Stephan Clements\*  
 Naomi Daws

Chris Goodman  
 Bethan Griffiths  
 Elizabeth Jones  
 Stanley Jose  
 Nia Kelly  
 Piotr Kucharski  
 Chris Littler\*  
 Muthuraja Marimuthu  
 Doug Morgan  
 Richard Pugh\*  
 Keivn Rafferty  
 Nirojan Sivapathasundararajah

### **Cardiff and Vale University Health Board**

Ceri Beynon  
 Poonam Bopanna  
 Clare Dallimore  
 Hywel Evans  
 Naomi Goodwin\*  
 Laura Jackson<sup>h</sup>  
 Kathryn Lloyd-Thomas  
 Zarah Paris  
 Anthony Short  
 Navneet Sinha  
 Mari Thomas

### **Cwm Taf Health Board**

Megan Burton  
 Louise Elliott  
 Najia Hasan<sup>h</sup>  
 Valerie Hilton\*  
 Kathryn James  
 Jessica Laura Lowe  
 Anna Musgrave<sup>h</sup>  
 Omar Alex Pemberton\*  
 Katie Ross  
 Rosie Scott

### **Hywel Dda Health Board**

Sunita Agarwal\*  
 Brian Campbell\*  
 Stuart Gill\*  
 Peter Havalda  
 Rhiannon Lewis  
 Christopher Nwaefulu  
 Vanie Rajesh  
 Abdulaziz Refaet  
 Shan Sekaran  
 Gopinath Selvaraj  
 Norbert Skarbit  
 Alun Thomas  
 Edward Todd  
 Adam Wood

### **England**

#### **Aintree University Hospitals NHS Foundation Trust**

Liz Clark  
 Sarah El Sheikha  
 Sam Howitt  
 Andrew Langdon



Simon Mercer  
Dermot Moloney\*  
Mari Roberts  
Ravish Shetty  
Emma Welfare

#### **Airedale NHS Foundation Trust**

Shivanandaswamy Kashimutt  
Wendy Lum Hee\*  
Claire Kurasz  
Paul Underwood <sup>a</sup>

#### **Ashford and St Peter's Hospitals NHS Foundation Trust**

Melinda Brazier  
Sam De Silva  
Samson Ma  
Louise McDevitt  
Katharine O'Rourke  
Tasmin Patel  
David Robinson\*  
Vatshalan Santhirapala  
Oliver Sykes  
Yize Wan

#### **Barking, Havering and Redbridge University Hospitals NHS Trust**

Ritesh Ganesh  
Mahir Khalil  
Hannah Lewis  
Shabir Qadri\*  
Nadeem Shakir  
Sheelaj Sharma

#### **Barnet and Chase Farm NHS Hospitals Trust**

Kakali Chattopadhyay  
Nicolas Hooker  
Rajeev Jha\*  
Janine Mawby  
James Parry  
Raj Shah  
Evan Wild  
James Thomas

#### **Barnsley Hospital NHS Foundation Trust**

Oliver Ashby  
Sunil Kumar Chaurasia\*<sup>d</sup>  
Rory Colhoun <sup>d</sup>  
Elinor Cromarty <sup>d</sup>  
Dawn Johnson  
Wei Yang Low <sup>d</sup>

#### **Barts and The London NHS Trust**

Jose Bastos  
Christopher Broomhead  
Lorell Brownlee  
Gregory Burch  
Marta Campbell  
Rory Carrigan  
Hadia Farooq  
Danielle Fawkes

Geetha Gunaratnam  
Lucy Guthrie  
Naomi Hancox  
Natasha Kennedy  
Mehnaz Khan  
Andy Kwok  
Hannah Leaman  
Queenie Lo  
Nurhayati Lubis\*  
Katherine MacGloin  
Vijeta Mahinthan  
Otto Mohr  
Angela Nicklin  
Olubukunola Ojo  
Constantinos Papoutsos  
Katherine Railton  
Amrit Roopra  
Simon Stacey

#### **Basildon and Thurrock University Hospitals NHS Foundation Trust**

Samuel Armanious\*  
Karen Culfear

#### **Bedford Hospital NHS Trust**

Douglas Bomford  
Anand Desai  
Preeti Dewan  
Henry Hammerbeck  
Michael Holland  
Peter Knowlden\*  
Ben Linton Willoughby  
Andrew Mckendry  
Muhammad Nasiruddin  
Alessandra Reis-Clark  
Helena Stafford

#### **Birmingham Women's NHS Foundation Trust**

Khalid Hasan  
Yasmin Poonawala  
Annabelle Whapples\*<sup>i</sup>

#### **Blackpool Teaching Hospitals NHS Foundation Trust**

Emma Brennan  
Janette Brown  
Rosanne Ching  
Jason Cupitt\*  
Karen Gratrix  
Katherine Hodgson  
Sean O'Beirn  
Dennis Padi  
Christopher Pemberton  
Maja Severn

#### **Bolton NHS Foundation Trust**

Jon Arnot-Smith  
Hugo Buckley  
Samuel Howell<sup>c</sup>  
Ruth Loeffler<sup>c</sup>  
Susan Moss

Seelanere Nandini  
Peter Sandbach\*<sup>c</sup>  
Emma Wheatley

#### Bradford Teaching Hospitals NHS Foundation Trust

Richard Briscoe  
Benjamin Brown  
Sarah Campion  
Sarah Cooper  
David Craske  
Peter Hart  
Tom Lawton  
Maria Marta <sup>a</sup>  
Taha Namik  
Adam Neep  
Martin Northey  
Rashmi Senaratne  
Robert Spencer\*  
Helen Stanworth  
Mark Stubbington <sup>a</sup>  
Amit Surah <sup>a</sup>

#### Brighton and Sussex University Hospitals NHS Trust

James Jack  
Jessica Lee  
Toni Perello Sancho  
Stuart White\*

#### Buckinghamshire Healthcare NHS Trust

Claire Ansley-Watson  
Alice Pearl Christensen  
Jonathan Collins  
Jeremy Drake\*  
Phil Duggleby  
Helen Gilfillan  
Samantha Jayaweera  
Mariam Latif  
Alice Loft  
Tamsin McAllister  
Jyoti Misra  
Amanda Mohabir  
Vanisha Parekh  
Hasita Patel  
James Robert Sheehan  
William John Stevens  
Nicholas Taylor  
Ravi Tomar  
Emily Traer  
Elizabeth Yates

#### Burton Hospitals NHS Foundation Trust

Seetal Aggarwal  
Catriona Frankling  
Georgia Knight i  
Clare Mewies  
Eleanor Tyagi\*  
Carole Webb

#### Calderdale and Huddersfield NHS Foundation Trust

Sarah Elizabeth Hennell

Stephen John Hill\*  
Amy Mayor  
David Pegg  
Amanda Pine  
Sally Price  
Amit Pruthi

#### Cambridge University Hospitals NHS Foundation Trust

Famila Alagarsamy  
Jim Bamber\*  
Jo Bytham  
Ailsa Liddle  
Bassey Brendan Nkanang  
Georgina Singleton  
Helen Surgenor  
Jacqueline Tahari  
Kelly Teversham  
Shanelle Wijesuriya

#### Central Manchester and Manchester Children's University Hospitals NHS Foundation Trust

Dilip Agarwalc  
Hassan Ahmadc  
Niamat Aldamlujic  
Sujesh Bansal\*c  
Neeraj Bhardwaj  
Kailash Bhatia\*c  
Tara Byottc  
Daniel Conway  
Devjay Datta  
Charlotte Dean  
Nick Greenwood\*c  
Amr Hassanc  
Mohammad Ibrahim  
Matthew James Jacksonc  
Amit Jain  
Maciej Kalata  
Swati Karmarkar\*c  
Helen Lewisc  
Emma Lightbody  
Mohamed Mahmoud  
Ijas Moideen  
Niall O'Keeffe  
Chinmay Patvardhanc  
Anand Rajasekaranc  
Richard Ramsaranc  
Isma Razzaq  
William Simpsonc  
Rebecca Sutton\*c  
Mruthunjaya Swamy\*c  
Katalin Szabo  
Cheng Yeow Tanc

#### Chelsea and Westminster Hospital NHS Foundation Trust

Laura Braidford  
Rhian Bull  
Jaime Carungcong  
Ivy Chan  
Alice Costello  
Ruth Cowen

Mark Cox  
 Kevin Haire  
 Katherine Horner  
 Inga Kelpanides  
 Ami Kotecha  
 Kylie Norrie  
 Tejal Patel  
 Amanpreet Sarna  
 Sneha Shah  
 Valeria Silvestre  
 Patrick Ward  
 Andrea Weigert\*  
 Michael Weston  
 Harriet Wordsworth

#### **Chesterfield Royal Hospital NHS Foundation Trust**

Sarah Capper d  
 Sian Edwards  
 Rachel Gascoyne  
 Sue Glenn  
 Emily Hall  
 Elaine Harris  
 Mohammed Khan  
 Matthew Needham d  
 Anand Padmakumar  
 Nick Spittle\* d  
 Lesley Stevenson  
 Julie Toms  
 Caroline Wearn  
 Amanda Whileman  
 Janina Woodward

#### **Christie Hospital NHS Foundation Trust**

Nesrine Ismailn  
 Jaya Nariani\*  
 Rafik Sedra

#### **City Hospitals Sunderland NHS Foundation Trust**

Lynn Fairless  
 Dawn Keightley  
 Eleanor Ripley  
 Marc Slorach\*

#### **Colchester Hospital University NHS Foundation Trust**

Richard Bayley  
 Debbie Campbell  
 Alison Ghosh  
 Samuel Kestner  
 Ram Kumar  
 Rachel Madders  
 Thomas McLoughlin\*  
 Sophia Paramanathan  
 Peter Wicks

#### **Countess of Chester Hospital NHS Foundation Trust**

Mary Aldous  
 Jonathan Breeze  
 David Castillo\*  
 Jenny Davies  
 Angela Deeley

Tom Donaldson  
 Michaela Duskova  
 Jamie Fanning  
 Maria Faulkner  
 Alain Fennessy  
 Brian Herath  
 Mark Howells  
 Helen Jeffrey  
 Anita Jhamatt  
 Gregory Moore  
 Ben Murray  
 Helen Robertson  
 Nicole Robin  
 Robert Neil Schofield  
 Eoin Young

#### **County Durham and Darlington NHS Foundation Trust**

Chloe Barclay  
 Sabrina Butcher  
 Helen Chipchase  
 Amanda Cowton  
 Lynsey Downing  
 Monica Jacksonb  
 Anthony Kennedy  
 James Limb\*  
 Mihaela Michituc  
 Kannan Mohanram  
 Mandy Porritt  
 Katherine Rouse  
 Priya Shekar  
 Alison Thompson  
 Linda Tinkler

#### **Croydon Health Services NHS Trust**

Srinivasan Dhileepan\*  
 Richard Doyle  
 Irfan Raza  
 Holly Sturgess

#### **Derby Hospitals NHS Foundation Trust**

Marie Appleby  
 Sallyann Bell  
 Trish Boateng  
 Teresa Grieve  
 Kathleen Holding  
 Ryan Humphries  
 Melody MacGregor  
 Susan Melbourne  
 Yvonne Newey  
 Karen Pearson  
 Qiong Pooler  
 Manni Sandhu  
 Karen Simmonds  
 Coral Smith  
 Jill Smith  
 Shafa Ullah  
 Vanessa Unsworth  
 John Williams\*

**Doncaster and Bassetlaw Hospitals NHS Foundation Trust**

Sunita Asif d  
 Mary Avvai  
 Amira Bassaly  
 Paul Bedford  
 Maneka Braganza d  
 Michelle Denton  
 Richard Dobson\* d  
 Agota Ermenyi  
 Ashraf Fakhry Farid  
 Mark Fowler  
 Padma Gopal  
 Aditya Krishan Kapoor d  
 Weeraman Karunaratne  
 Rachel Lee  
 Shanmugam Narayanaswamy  
 Matthew Neal  
 David Northwood d  
 Christopher Palmer  
 Joel Perfitt d  
 Javaid Rashid  
 Najam Saqib  
 Parul Talati  
 Tim Vemmer  
 Vinesh Vincent B  
 Ben Williams

**Dorset County Hospital NHS Foundation Trust**

Jonathan Chambers\*  
 Russell Goodall  
 Erica Jolly  
 Stephanie Jones  
 James Keegan  
 Sarah Moreton  
 Jai Vedwan

**Dudley Group NHS Foundation Trust**

Michael Allan  
 Clare Allcock  
 Roisin Baker i  
 Felicity Corcoran  
 Phillip Howells  
 James Hutchinson  
 Sarah McCormick  
 Ciro Morgese  
 Richard Pierson\* i  
 Julian Sonksen  
 Rebecca Storey  
 Meroitra Susan  
 Ben Watkins

**Ealing Hospital NHS Trust**

Leena Ali\*  
 Shahrzad Pakkar Tadbiri  
 Seosoon Seah\*

**East and North Hertfordshire NHS Trust**

Siân Batley  
 Shanmugasundaram Gowrie-Mohan\*

Yohinee Rajendran

**East Cheshire NHS Trust**

Kieran Bowdren  
 Andrew Gorman\*

**East Kent Hospitals University NHS Foundation Trust**

Sanjay Agrawal  
 Farrukh Ameer  
 Roya Bayliss  
 James Bland  
 Claire Braid  
 Rajkumar Johi\*  
 John MacKinnon  
 Joanna Moore\*  
 Nagendra Natarajan\*  
 Rini Poddar  
 Rebekah Rodgers  
 Rebecca Samuels  
 Andrew Skinner  
 Christopher Turner

**East Lancashire Hospitals NHS Trust**

Marion Andersonc  
 Kate Beresford\*  
 Srikanth Chukkambotla  
 Hawa Desai  
 Janie Hartley  
 Siobhane Holdenc  
 Farzana Ibrahim  
 Matthew Leliuga  
 Duncan MacRossonc  
 Aji Mathew\*c  
 Michael Pollard  
 David Rawlinson  
 Haroon Waqar-Uddin  
 John Weeks

**East Sussex Healthcare NHS Trust**

Anthony Cochrane  
 Leon Dryden  
 Venkatesan Duraiswamy  
 Philippa Marshall\*  
 Amanda Milligan  
 Roisin Monteiro  
 Seema Pai  
 Frantisek Slaninka  
 Claire Stikans

**Epsom and St Helier University Hospitals NHS Trust**

Andrew Bailey  
 Caroline Bullen  
 Joan Desborough  
 Tasneem Katawala  
 David Male  
 Amrut Mudanna  
 Jasmina Perinpanayagam  
 Franca Serafini  
 Geoff Thorning\*



**Frimley Park Hospital NHS Foundation Trust**

Victoria Atkinson  
 Claire Cameron  
 Merle Cohen  
 Britt Garwood  
 George Godfrey  
 Sara Lantz-Dretnik  
 Ana Robles  
 Justin Woods\*

**Gateshead Health NHS Foundation Trust**

Connor Dooley  
 Vanessa Linnett\*  
 Stephen Mowatb  
 Jenny Ritzema  
 Louise Sanderson

**George Eliot Hospital NHS Trust**

Divya Khare  
 Vivek Poongavanam\*<sup>i</sup>  
 Manoj Ravindran

**Gloucestershire Hospitals NHS Foundation Trust**

Katherine Belfield  
 Emily Buckwell  
 Stephanie Connelly  
 Amy Dodd  
 Paul Downie\*  
 Charlotte Earnshaw  
 Natalie Grayf  
 Sarah Major  
 Kelly Matthews  
 Victoria Ormerod  
 Nishi Patel  
 Sophie Scuttf  
 Kathleen Shelley  
 Laura Thomsonf  
 Carolyn Warr\*

**Great Western Hospitals NHS Foundation Trust**

Sam Andrews  
 Gary Baigel\*  
 Johanna Mockler  
 Jon Rivers  
 Lucy Williams

**Guy's and St Thomas' NHS Foundation Trust**

James Arlidge  
 Victoria Bennett  
 Alexandra Bond  
 Arun Kochhar  
 Chandni Parikh  
 Jan Schumacher\*  
 Agnieszka Skorko  
 Davina Wong

**Hampshire Hospitals NHS Foundation Trust**

Samantha Allen  
 Helen Bromhead\*

Alison Corker  
 Victoria Corner  
 Angie Dempster  
 Olatunde Fagbayimu  
 Johanna Hellstrom  
 Jane Martin  
 Lewis Matthews  
 Philip McGlone<sup>e</sup>  
 Richard Partridge\*  
 Emma Rogers  
 Angus Royal  
 Joanne Tambellini  
 Dawn Trodd  
 Nimu Varsani  
 Caroline Wrey Brown  
 Louise Young<sup>e</sup>

**Harrogate and District NHS Foundation Trust**

Jennifer Firth-Gieben  
 Sarah Peacock  
 Abhinav Kant\*  
 Chris Smales

**Heart of England NHS Foundation Trust**

John Benjamin  
 Gemma Dignam<sup>i</sup>  
 Hannah Fuller  
 Saravanababu Gnanaseakaran\*  
 Bethan Hale<sup>i</sup>  
 Vivienne Madden  
 Alan Marshall  
 Sandur Naresh  
 Priya Ramchandran  
 Sethu Veerabadran\*  
 Vijay Kumar Venkatesh  
 Guenter Weissenhorn

**Hillingdon Hospitals NHS Foundation Trust**

Charlotte Stephanie Cattlin  
 Francesca Mazzola  
 Constandinos Papageorgiou\*  
 Shivali Patel

**Hinchingbrooke Health Care NHS Trust**

Aisling Connolly  
 Saad Gomaa  
 Dancho Ignatov\*  
 Zhana Ignatova  
 Ilya Kantsedikas  
 Namratha Mathai  
 Mohammad Tayyab Memon  
 Ben Miller  
 James O'Brien  
 Georgina Singleton  
 Arivalagan Sivakkolunthu  
 Sivaprakash Vaitheeswaran

**Homerton University Hospital NHS Foundation Trust**

Emily Bayne  
 Jens Full

Hoon Ying Lau  
Winston Ng  
Sandor Orosz  
Tabitha Tanqueray\*  
Andrew Wilkinson

#### Hull and East Yorkshire Hospitals NHS Trust

Caroline Abernethy  
Rachel Bowden <sup>a</sup>  
Pallavbhai Desai <sup>a</sup>  
Omer Farooq <sup>a</sup>  
Andrew Gratrix\*  
Anne-Mair Hammond-Jones <sup>a</sup>  
Vikas Kaura <sup>a</sup>  
Umakanth R Kempanna <sup>a</sup>  
Victoria Martinson  
Muhammad Shakeel Riaz <sup>a</sup>  
Amjad Sami  
Neil Smith  
James Stevenson <sup>a</sup>  
Ruth Ugochukwu  
Mamoon Yusaf <sup>a</sup>

#### Imperial College Healthcare NHS Trust

Melloney Allnutt  
Glenn Arnold\*  
Satya Bhat\*  
Nicola Boyer  
Rachel Freedman  
David Harris  
Gillian Hornzee  
Asantha Jayaweera  
Craig Jones  
Ashwin Kalbag  
Shamsher Khan  
Kiranjit Khazan Singh  
Zheyne Konstantinova  
Stuart Lawrie  
David Magee  
Nisha Nimalan  
Laura Peltola  
Rajan Saini  
Marco Scaramuzzi  
Akshay Shah

#### Ipswich Hospital NHS Trust

Alice Barnes  
Debra Beeby  
Stephanie Bell  
Lyndsey Cubitt  
Daniel Gibney  
Louise Hunt  
Arun Natarajan\*  
Margaret Oatley  
Genessa Peters  
Bally Purewal  
Judi Ramsey  
Joanne Rickett  
Ginny Rose  
Stephanie Stoddart  
Edward Watson

#### Isle of Wight NHS Trust

Gabor Debreceeni\*  
Laszlo Ordog  
Isobel Rice  
Souvik Sanyal

#### James Paget University Hospitals NHS Foundation Trust

Dushani Atapattu  
Pieter Bothma\*  
Kiran Dasari  
Tammy George  
Abby Greaves  
Christian Hacon  
Pushpalatha Linga Nathan

#### Kettering General Hospital NHS Foundation Trust

Duncan Baines  
Anjali Bilolikar  
Shiv Chande  
Satyanarayana Jakkampudi\*  
Jeannie Kessell  
Prakash Krishnan  
Pawan Kumar  
Jo Novaga  
Parizade Raymode  
Philip Watt  
Zoe Whitman  
Elinor Wighton

#### King's College Hospital NHS Foundation Trust

Daniel Abell  
Michael Adlam  
Luke Banks  
Nadia Blunt  
Philip Hopkins\*  
James Gill  
Roshmi Kumar\*  
Alena Mulenga Skupenova  
George Perrett  
Andrew Selman  
Jasjot Kaur Singhota  
Helen Statham\*

#### Kingston Hospital NHS Foundation Trust

Tharumalingam Gowripalann  
Rumiko King  
Sarang Puranik\*

#### Lancashire Teaching Hospitals NHS Foundation Trust

Mark Children  
Ian Clegg  
Karen Collins  
James Garbarino<sup>c</sup>  
Andrew Hall  
Maurice John Jones\*<sup>c</sup>  
Jessica Maycock  
Andy Ng  
Jennifer Pettit<sup>c</sup>  
Alison Quinn<sup>c</sup>  
Grace Singleton

Yenyeen Teh<sup>c</sup>  
 Thomas Walton  
 Tom Whitehead  
 Amanda Zacharzewski

#### Leeds Teaching Hospitals NHS Trust

Ossian Auckland-Child<sup>a</sup>  
 Zoe Beardow  
 Christopher Bull<sup>a</sup>  
 Anna Costello<sup>a</sup>  
 Stuart Elliot  
 Michal Luniewski<sup>a</sup>  
 Beverley Parker  
 Papanna Ramakrishnan  
 Caroline Thomas<sup>a</sup>  
 Matthew Tinker  
 Brian White\*  
 Simon Whiteley\*

#### Lewisham and Greenwich NHS Trust

Manju Agarwal\*  
 Seb Baxter  
 John Cronin

#### Liverpool Heart and Chest Hospital NHS Foundation Trust

Seema Agarwal\*  
 Peter Delve  
 Sianedd Elliott  
 Gerald Smith

#### Liverpool Women's NHS Foundation Trust

Philip Barclay\*  
 Emily Christie

#### Luton and Dunstable Hospital NHS Trust

Suhanya Allirajah  
 Edward Dewhirst  
 Benjamin Marriage  
 Natalia Notkina  
 Imran Razzaq  
 Emily Spence  
 Suhail Zaidi\*

#### Maidstone and Tunbridge Wells NHS Trust

Philip John Blackie\*  
 Dawn Harpham  
 Catherine Lloyd  
 Tracey Nolan  
 Charles Prior

#### Medway NHS Foundation Trust

Jon Aron  
 Bryony Davy  
 Kirtida Mukherjee\*  
 Brenda Nyamaizi

#### Mid Cheshire Hospitals NHS Foundation Trust

Zaherali Damani  
 Penelope Edmondson  
 Fozia Hayat  
 Nicolas Price\*  
 Laura Wilson

#### Mid Yorkshire Hospitals NHS Trust

Philip Antill  
 Adam Beaini  
 Matthew Bromley  
 Rob Charles<sup>a</sup>  
 Robert Jackson<sup>a</sup>  
 Rebecca Lathey<sup>a</sup>  
 Mohamed Lklouk  
 Oliver Martin  
 Irfan Mohammad Omar  
 Alastair Rose  
 Oliver Ross-Smith<sup>a</sup>  
 Anupam Sharma  
 Karen Simeson  
 Annika Smith  
 Rachel Stock  
 Simon Timperley<sup>a</sup>  
 Sandeep Varma\*

#### Milton Keynes Hospital NHS Foundation Trust

Ramesh Achari  
 Chrissie Chevis  
 Radu Chirvasuta  
 Veronica Edgell  
 John Ekpa  
 Zahra Fazel  
 Manu Gupta  
 Nathan Huneke  
 Surekha Jani  
 Helen Jeffers  
 Amitabh Lahkar  
 Graziana Massolini\*  
 Hayley Moss  
 Cheryl Padilla-Harris  
 Cherish Paul  
 Bernadetta Sawarzynska-Ryszka  
 Jeannette Smith

#### Moorfields Eye Hospital NHS Foundation Trust

Nicoletta Catteruccia\*  
 Mhairi Jhugursing  
 Mohammed Kadim  
 Jonathan Mathers  
 Rutesh Mehta  
 Radha Sabaratnam

#### Newcastle upon Tyne Hospitals NHS Foundation Trust

Shylesh Aravindan  
 Emily Bonner  
 Thomas Cairns<sup>b</sup>  
 Mark Callaghan<sup>b</sup>  
 Nicholas Crawford-Upton  
 Christopher Gibb<sup>b</sup>

Jane Gibson  
Ben Goodman<sup>b</sup>  
Tom Haigh  
Amy Holley  
Linda McGhee<sup>b</sup>  
Claire Mitchell<sup>b</sup>  
Andrew Pollard  
Thomas Edward Poulton  
Sneha Prasad<sup>b</sup>  
Edward Pugh<sup>b</sup>  
David Saunders\*  
Sharon Scully\*  
Mirjana Starinac-Baldwin  
Clare Watkinson<sup>b</sup>

#### Norfolk and Norwich University Hospitals NHS Foundation Trust

Siddharth Adyanthaya  
Katrina Barber  
Jian Wen Chan  
Caron Dames  
Amy-Jo Farrow  
Jim Flatt  
Grainne Garvey  
Jane Hermanowski  
Michael Irvine  
Caroline Reavley\*  
Santhosh Kumar Thandayuthapani  
Joanna Wheble

#### North Bristol NHS Trust

Alia Darweish<sup>f</sup>  
Sarah Hoskins<sup>f</sup>  
Kathryn Jenkins\*  
Sarah Martindale\*  
Katherine Jane Nickell  
Gemma Nickols<sup>f</sup>  
Biju Peringathara<sup>f</sup>  
Sarah Todhunter<sup>f</sup>

#### North Cumbria University Hospitals NHS Trust

Hannah Crowther  
Suresh Eapen  
Gail Fitzsimmons\*  
Fiona Graham\*  
Leon Jonker  
Nicci Kelsall  
Savin Pokhrel  
Una Poultney  
Tracey Riley  
Sarah Thornthwaite  
Katie Williams  
Toni Wilson

#### North Middlesex University Hospital NHS Trust

J. A. Ezihe-Ejiofor\*  
Hemantha Handapangoda  
Rajesh Krishnan  
Bonnie Kyle  
Stefan Sevastru

#### North Tees and Hartlepool NHS Foundation Trust

Adrian Gooding  
Mika Hamilton  
Lisa Molus  
Pradeep Orakkan  
David Pritchard\*

#### North West London Hospitals NHS Trust

Michael Berry  
Jacek Borkowski  
Thomas Fitzgerald\*  
Nicola Pearson  
Ivan Wong

#### Northampton General Hospital NHS Trust

Swarna Athukorala  
Sunjay Bhadresha  
Rosemarie Carrick  
Omur Choudhury  
Prashant Kakodkar\*  
Andy Kempa  
Senthil Kumaran  
Akeeban Maheswaran  
Ihaab Matabdin  
Saurabh Mehrotra  
Kate Smith  
Jennifer Spimpolo  
Ulrika Winstone

#### Northern Devon Healthcare NHS Trust

Geraldine Belcher  
Garry Henry\*  
Nigel Hollister  
Rachel Horn  
Jane Hunt  
Maria Karatzi  
Eleanore Quinn<sup>g</sup>  
David Robertshaw  
Amanda Skinner  
Lucia Stancombe<sup>g</sup>

#### Northern Lincolnshire and Goole Hospitals NHS Foundation Trust

Abbey Clark <sup>a</sup>  
Sanjeev Garg\*  
Priyadarshan Potla  
Andrew Quin <sup>a</sup>  
Anju Raina  
Roshan Rao <sup>a</sup>  
Mustafa Raza

#### Northumbria Healthcare NHS Foundation Trust

Maureen Armstrong  
Mark Dalton  
Joanne Dawson  
Leonie English  
Neil Owen Hall  
Renee Hope  
Thomas Mackie  
Fiona McMenemie



Joseph Nevin  
Adrian Taylor\*

#### Nottingham University Hospitals NHS Trust

Michal Czernicki  
Corinne Deakin  
Simon Denning  
Prerna Mehrotra  
Iain Moppett\*  
Thomas Munford  
Matthew O'Meara  
Katie Samuel  
Deborshi Sinha  
Ganna Sliusar  
Deepak Subramani

#### Oxford University Hospitals NHS Trust

Vassilis Athanassoglou  
Amisha Burumdayal  
Kim Carter  
Alexandra Crean  
Ian Edmond  
Soumitra Ghosh  
Cyndi Goh  
Eleanor Harvey  
Luis Lee  
Nicholas Love  
Laila Morris  
Georgina Neall  
Amy Sangam  
Shaun Scott\*

#### Papworth Hospital NHS Foundation Trust

Joanne Irons  
Rebecca McClean  
Amy Needham  
Elizabeth Ogilvie  
Kiran Salaunkey  
Stephen Webb\*

#### Pennine Acute NHS Trust

Salmin Aseri<sup>c</sup>  
Sarah Babatunde<sup>c</sup>  
Amit Bhargava<sup>c</sup>  
Juie Cunningham  
Boopathy Dhanasekar<sup>\*c</sup>  
Alastair Duncan<sup>c</sup>  
Jennifer Gwinnutt<sup>c</sup>  
Holly Hammond<sup>c</sup>  
Joanne Humphreys<sup>c</sup>  
Linda Kent  
Owen King<sup>c</sup>  
Benjamin Kolb<sup>c</sup>  
Julie Kuzhively<sup>c</sup>  
Juliette Li Wan Po<sup>c</sup>  
Denise McSorland  
Zahaan Wayne Pinto  
Bhaskar Saha<sup>\*c</sup>  
Jo Taylor  
Paula Usher  
Ming Wilson<sup>c</sup>

#### Peterborough and Stamford Hospitals NHS Foundation Trust

Najwan Abu Al-Saad  
Balraj Appadu\*  
Karen Beaumont  
Christopher Hall  
Nazia Khan  
Rachelle MacMillan

#### Plymouth Hospitals NHS Trust

Rohan Babla<sup>g</sup>  
Charlotte Bailey  
Molly Bancroft  
Karen Brookes  
Leeanne Carwithen  
Helen Davies  
Juleen Fasham<sup>g</sup>  
Danielle Franklin<sup>g</sup>  
Julie Greatrex  
Rosie Griver<sup>g</sup>  
Catherine Harden  
Craig Holdstock<sup>g</sup>  
Matt Hawkins  
Sandeep Kusre<sup>g</sup>  
Val Morgan  
Gary Minto<sup>\*g</sup>  
Claire Northcott  
Abigail Patrick  
Suzanne Price  
Jeanne Louise Schonborn<sup>g</sup>  
Ellie Shepherd  
Rosalyn Squire  
Geoff Tavener<sup>g</sup>  
Liz Whitby  
Jackie Wooding

#### Poole Hospital NHS Foundation Trust

Katharine Browne  
Hermione Denniss  
Tom Everett  
Michael Girgis\*  
Harris Wain

#### Portsmouth Hospitals NHS Trust

James Bain\*  
Adam Edwards  
Renee Ford  
Rebecca Fry  
Li Ping Gan  
Helen Gordon  
Sophia Henderson<sup>e</sup>  
Susannah Palmer  
Rebecca Reeves  
Francesca Riccio  
Esme Sleep  
Zoe Smith

#### Queen Victoria Hospital NHS Foundation Trust

Julian Giles\*  
Valentina Neroli

Isabelle Reed  
Debbie Weller

#### Robert Jones and Agnes Hunt Orthopaedic Hospital NHS Foundation Trust

Rob Alcock  
Robert Banerjee  
Andrew Bing  
Sumeeta Conry  
Jayne Davies  
Kirsty Davies  
David Ford  
Robert Freeman  
Peter Gallacher  
Niall Graham  
Stuart Hay  
Simon Hill  
David Jaffray  
John John\*  
Huw Jones  
Fouzia Kader  
Siddalingaprabhu Katti  
Julia Kennedy  
Nigel Kiely  
Ruth Longfellow  
Ciaran Moran  
James Neil  
Matthew Ockendon  
James Pattison  
James Richardson  
Richard Roach  
Sophie Shapter  
Richard Spencer-Jones  
Niall Steele  
Julie Steen  
Jayesh Trivedi  
Marck Vanliefeland  
Emma Wain  
Huw Williams  
Rotherham NHS Foundation Trust  
William Lindsay<sup>d</sup>  
Frances Colquhoun<sup>d</sup>  
Matthew Craig Faulds<sup>d</sup>  
Meredyth Harris  
Anil Hormis\*<sup>d</sup>  
Joanne Howe  
Sean Keating<sup>d</sup>  
Amy Thomas<sup>d</sup>

#### Royal Berkshire NHS Foundation Trust

Tamara Alexander  
Richard Barnes  
Jennifer Cade  
Joanna Cudlipp  
Patrick Dill-Russell\*  
Henry Jefferson  
John MacKenzie  
Gopalan Radhakrishnan

#### Royal Bournemouth & Christchurch Hospitals NHS Foundation Trust

Duncan Chamblor  
James Craig\*  
Emily Cross  
Stephen Phillips  
Paul Stevens  
Emma Willett  
Steven Williams  
Laura Wood

#### Royal Brompton and Harefield NHS Foundation Trust

Rob Anker  
Tali Heymann  
Katheryn Fogg\*  
Sandra Reinero  
Aikaterini Vlachou

#### Royal Cornwall Hospitals NHS Trust

Alyson Andrew  
Weiss Anna  
Amanda Datson  
Nicki Devooght-Johnson  
Jacqueline Dingle  
William English  
Anna Fouracres  
Juan Graterol\*<sup>g</sup>  
Lynne Graves  
Alexander Ishimaru  
Patrycja Jonetzko<sup>g</sup>  
Keely Lane  
Tom Lawson<sup>g</sup>  
Andrew MacAlister Hall<sup>g</sup>  
Kathleen Mulcahy<sup>g</sup>  
Anna Ratcliffe<sup>g</sup>  
William Rutherford<sup>g</sup>  
Jessica Summers  
Gina Townley  
Lisa Trembath  
Leanne Welch  
Geoffrey Wigmore<sup>g</sup>

#### Royal Devon and Exeter NHS Foundation Trust

Elizabeth Fontaine<sup>g</sup>  
Emily Howells<sup>g</sup>  
David Hutchins<sup>g</sup>  
Lawrence Kidd<sup>g</sup>  
Samantha Lyons<sup>g</sup>  
Katharine Meikle\*<sup>g</sup>  
Richard David Wassall<sup>g</sup>  
Thomas Woodward<sup>g</sup>

#### Royal Free London NHS Foundation Trust

Ciara Donohue  
Faezeh Godazgar  
Charlotte Haldane  
Sarah James  
Carlos Kidel  
Sue Mallett\*  
Edward Palmer

### Royal Liverpool and Broadgreen University Hospitals NHS Trust

Jonas Appiah-Ankam  
Jane Beattie  
Jennifer Burgess  
Laura Dagg  
Nirmal Daniel\*  
Joanna Fawcner-Corbett  
Will Gauntlett  
Sally Hargreaves  
Michael McGovern  
Sarah Mitchell  
Christopher Parker  
Sergey Rastopyrov  
Alicia Roitberg-Henry  
Maria Safar

### Royal Marsden NHS Foundation Trust

Oliver Blightman  
Stuart Cleland  
Shaman Jhanji\*  
Rohit Juneja\*  
Helen Jane Lawrence  
Sophie Uren

### Royal National Orthopaedic Hospital NHS Trust

Anamika Agrawal  
Paul Gunning\*  
Henna Khetani  
Benjamin Parsons

### Royal Orthopaedic Hospital NHS Foundation Trust

Chandra Bhimarasetty  
Laura Bird  
Dinakar Gowda  
Rekha Jayapal  
Faye Moore  
Salmaan Mughal  
Sam Papadopoulos  
Narendra Babu Siddaiah\*<sup>i</sup>

### Royal Surrey County Hospital NHS Foundation Trust

Sophie Childs  
Matthew Dickinson\*  
Andrew McKechnie  
Frederick Wilson

### Royal United Hospital Bath NHS Trust

Cheryl Achary<sup>f</sup>  
Jeremy Astin<sup>f</sup>  
Nicholas Harris  
Lesley Jordan\*  
Inthu Kangesan  
Catherine Lomasney  
Melanie McDonald

### Royal Wolverhampton Hospitals NHS Trust

Rebecca Coles  
Kate Griffin

Richard Lightfoot  
Rebecca Micklewright\*  
Linga Prasad<sup>i</sup>  
Sreekanth Uppugonduri\*

### Salford Royal NHS Foundation Trust

Charlotte Ash  
Cally Burnand\*<sup>c</sup>  
Richard Cooper  
Simon Forrington  
Hywel Garrard  
Alison Jones<sup>c</sup>  
Leigh Willoughby\*<sup>c</sup>

### Salisbury NHS Foundation Trust

Alpha Anthony  
Caroline Clarke  
Ilana Delroy-Buelles<sup>e</sup>  
Christian Schopflin<sup>e</sup>  
Andrew Swain  
Simon Williams\*

### Sandwell and West Birmingham Hospitals NHS Trust

Mary Cheung  
Kavit Dasari  
Rachael Dolan  
Phillip El-Dalil  
Katheryn Grange  
Gunasheela Kalashetty  
Santhana Kannan\*<sup>i</sup>  
Arif Jamil Khan  
Laura Kocierz  
Frances Lay  
Miriam Namih<sup>i</sup>  
Harry Phillips  
Mrutyunjaya Rao Rambhatla\*  
Tracy Wong

### Sheffield Teaching Hospitals NHS Foundation Trust

Hemant Aaytee<sup>d</sup>  
Norfaizan Ahmad<sup>d</sup>  
Sireesha Aluri<sup>d</sup>  
Kris Bauchmuller<sup>d</sup>  
Helen Ellis<sup>d</sup>  
Zakir Hajat<sup>d</sup>  
Holly Jeffery<sup>d</sup>  
Alex Kojro<sup>d</sup>  
Andrew Cruikshanks<sup>d</sup>  
Andrew Leeson<sup>d</sup>  
Duncan Miller<sup>d</sup>  
Rama Pothireddy<sup>d</sup>  
Ajay Raithatha<sup>d</sup>  
Catherine Riley<sup>d</sup>  
Jonathan Rosser<sup>d</sup>  
Rachel Louise Wadsworth<sup>d</sup>  
Ian Wrench\*<sup>d</sup>

### South Devon Healthcare NHS Foundation Trust

Martin Dore<sup>g</sup>  
Lydia Jones<sup>g</sup>

Chris Leighton<sup>g</sup>  
Jane Montgomery\*<sup>g</sup>  
Claire Ward<sup>g</sup>

#### South Tees Hospitals NHS Foundation Trust

Rasha Abouelmagd  
Lukasz Badek  
Kirsty Baillie  
Anita Baldea  
David Booth\*  
Louise Cawthorn  
Emanuel Cirstea  
Kerry Colling  
Lauren Crook  
Anand Damodaran  
Mohamed Eid<sup>b</sup>  
Janet Gunn  
Christoph Muench\*  
Anand Nadgir  
Rebecca Parker  
Kavita Upadhyaya

#### South Tyneside NHS Foundation Trust

Gayle Clifford  
Christian Frey\*  
Shiv Gurung  
Philippa Laverick

#### South Warwickshire NHS Foundation Trust

Alastair Fairfield  
Emert White\*

#### Southend University Hospital NHS Foundation Trust

Kapil Arora  
Blanca Boira\*  
Simon Matthews  
Karen Rhodes  
Maylan Webb

#### Southport and Ormskirk Hospital NHS Trust

Andrew Kent\*  
Helen Terrett

#### St George's Healthcare NHS Trust

Roopa Sindhu Devanahalli\*  
Victoria Eleanor Crozier Ferrier  
James Hayward  
Clare Ivermee  
Anastasia-Eleni Legga  
Laura Litster  
Georgia Monantera  
Ben Morrison  
Rita Saha  
Guy Sanders  
Natashia Schneider  
Nikunj Shah  
Rohan Vandabona  
James Wilson

#### St Helens and Knowsley Teaching Hospitals NHS Trust

Andrew Fisher  
Vandana Goel  
Preeti Kuduvalli\*  
Dominic Peter Douglas Nielsen  
Kim Porter

#### Stockport NHS Foundation Trust

Janette Curtis  
Sophie Jagatia  
Deborah Lee  
Leila Nasser  
Sarah Scanlon  
Helen Simmons<sup>c</sup>  
Elizabeth Thomas\*<sup>c</sup>

#### Surrey and Sussex Healthcare NHS Trust

Olivia Davies  
Hannah Dawe  
Gannat Gabr  
Ashley Hague  
Richard Hawkins  
Christie Locke  
Aikaterini Papadopoulou  
Simon Parrington\*  
Vijaya Ramaiah  
Anna Riccoboni  
Elizabeth Smee  
Frederick Van Damme  
Matthew Willcocks

#### Tameside Hospital NHS Foundation Trust

Anand Kulkarni\*  
Venkata K Melachuri\*<sup>c</sup>  
John Nicholls  
Hannah Richardson<sup>c</sup>  
Laura Stephanie Talbot<sup>c</sup>  
Stephen Wythe<sup>c</sup>

#### Taunton and Somerset NHS Foundation Trust

Lindsey Arrick<sup>g</sup>  
Stuart Collins\*<sup>g</sup>  
Thomas Evans<sup>g</sup>  
Harriet Gardiner<sup>g</sup>  
James Garwood<sup>g</sup>  
Olivia Gokhale<sup>g</sup>  
Suzanne Grenfell<sup>g</sup>  
Alexander Jones<sup>g</sup>  
Rebecca Pugsley<sup>g</sup>  
Nicholas Soultter<sup>g</sup>  
Borys Topor<sup>g</sup>  
Tim Wilson<sup>g</sup>

#### The Princess Alexandra Hospital NHS Trust

Natasha Constandinou  
Joanna Hackney  
Kevin Hamilton\*  
Jenna Hutchinson  
Michelle Reichman

**The Whittington Hospital NHS Trust**

Karen Fan  
Heloise Hayakawa  
Jane Silk\*  
Duncan Wagstaff

**United Lincolnshire Hospitals NHS Trust**

Simon Archer  
Helen Ayre  
Susie Butler  
Matthew Daunt  
Val Elliott  
Joanne Fletcher  
Sarah Ford  
Yusuf Ghumra  
Anne Hardwick  
Suganthi Joachim\*  
Manish Kakkar\*  
Amy Kirkby  
Jonathan Lewis  
Ann Marsh  
Beverley Mashegedo  
Madhur Mehta  
Kimberley Netherton  
Rebecca Norton  
Tara Palmer  
Natalie Reinoso  
Amanda Roper  
Victoria Sherburn  
Andrew Sloan  
Isobel Thomas  
Maria Tute

**University College London Hospitals NHS Foundation Trust**

Douglas Blackwood  
Sara Bowman  
Maria Chazapis  
Roger Cordery\*  
Tejal Dave  
Catriona Ferguson\*  
Roxaan Jappie  
Sathish Kumar  
Mark Lambert  
Leda Lignos  
Valpuri Luoma\*  
Emilie Martinoni Hooenboom  
Joanna Mavridou  
Vidhya Nagaratnam\*  
James Pennington  
Upeka Ranasinghe  
Ramai Santhirapala  
Sohini Sengupta  
Louisa Shovel  
Serena Sodha  
Adrienne Stewart\*  
Julia Taylor  
Manni Waraich

**University Hospital of North Staffordshire NHS Trust**

Beryl Alcock

Felicity Clark  
Viv Colclough  
Sarah Dawson  
Jane Delaney  
Satyaheet Ghatge  
Ellen Haire  
Anne Harrison  
Ellen Hodgson  
Rahul Kumar\*  
Elin Jones  
Piotr Ohly  
Nicola Pattison  
Marissa Plaza  
Mohan Sathyamoorthy  
Lisa Wilkings

**University Hospital of South Manchester NHS Foundation Trust**

Sarah Blomeley<sup>c</sup>  
Jennifer Cunningham  
Rebecca Elder  
Johnny Kenth  
Matthew Leech<sup>c</sup>  
Wendy Nichols  
Alison Walker  
Stephen Washington\*<sup>c</sup>  
Brian Williams<sup>c</sup>

**University Hospital Southampton NHS Foundation Trust**

Samar Al-Rawi\*  
Yousra Ahmad  
Clare Bolger  
Anne-Marie Bougeard  
Hannah Collins  
Rhys Davies  
Kim Golder  
Alexandra Hawken  
Lesley Hawkins  
Thomas Hutley  
Alexa King  
Denny Levett  
Angela Lim  
Nihal Mahagamage  
James Montague  
Andrew Nash  
James Plumb  
Karen Salmon  
Leanne Seaward  
Anamika Sehgal  
Laura Tompsett  
Bryony Tyrell  
Andrew Vaughton  
Beverley Wadams  
Mai Wakatsuki\*

**University Hospitals Birmingham NHS Foundation Trust**

Muneeba Ahmed<sup>i</sup>  
Somasundaram Jeyanthan  
Katherine Laver<sup>i</sup>  
Rachel Moore  
Hasnain Saeed  
Laura Tasker\*

### University Hospitals Bristol NHS Foundation Trust

Andrew Bartlett  
Hannah Blanshard  
Alan Cohen  
Helen Davies<sup>f</sup>  
Nirosha De Zoysa  
Shailendra Deep  
Claire Dowse  
Chris Gough  
Lisa Grimmer  
Ben Howes  
Sarah Jarvis  
Attila Jonas  
Neil Muchatuta  
Yin Ng<sup>f</sup>  
Marcin Pachucki<sup>f</sup>  
Claudia Paoloni\*  
Helen Parker  
Tamara Semei-Spencer  
Nicola Stewart  
Sarah Thomas  
Hannah Wilson  
Nicholas Wharton\*

### University Hospitals Coventry and Warwickshire NHS Trust

Carol Bradbury\*  
Falguni Choksey  
Nageena Hussain  
Ahmed Mesbah  
Bradley Mullins  
Arif Qureshi  
Chandra Vaidyanath

### University Hospitals of Leicester NHS Trust

Matthew Charlton  
Navreet Ghuman  
Sameer Hanna-Jumma  
Stephen Hillier  
Jim Horn  
Kaushliya Katechia  
Gary Lau  
Ralph Leighton\*  
Jennifer Norris  
Sarah Bowrey

### University Hospitals of Morecambe Bay NHS Foundation Trust

Claire Bartlett  
Karen Burns  
Kate Lloyd  
Stephanie McGrath  
Stephanie Monks  
Matthew Dominic Newport  
Anastasia Price  
Corinne Rimmer\*  
Andrew Smith  
Insiya Susnerwala  
Clare Tibke

### Walsall Healthcare NHS Trust

Chris Clulow  
Gareth Lodwick  
William Malein  
Oliver Oxenham  
Sumant Shanbhag\*  
Marc Whitehouse

### Warrington & Halton Hospitals NHS Foundation Trust

Seema Charters\*  
Timothy Furniss  
John Gardner  
Chetana Kataria  
Rachel Leopold  
Sumit Mitra  
Natasha Permall  
Peter Turton

### West Hertfordshire Hospitals NHS Trust

Malthi Dudley\*  
Aditi Ghei  
Sumit Jha  
Richard Lin  
Ratna Makker  
Jennifer Taylor  
Elaine Walker

### West Middlesex University Hospital NHS Trust

Edward Amiry  
Jonathan Berger  
Lie Wah Johnson  
Alexandra Matson\*  
Tim Peters\*  
Metod Oblak  
Cosmo Scurr  
Lilia Tony  
Thomas Young

### West Suffolk NHS Foundation Trust

Joel Chin  
Vijayakumar Gopal\*  
Lisa Grimes  
Sally Humphreys  
Laura Kessack  
Katharina Kohler  
Rajesh Vasiraju

### Western Sussex Hospitals NHS Foundation Trust

Sonia Akrimi  
Anna Cave  
Charlotte Crossland  
Paul Crowest  
Emily Dana\*  
Rachael Grimaldi  
Katherine Hunter  
James Nicholson\*  
Zehra Ozfirat  
Laura Frances Pocock  
Michael Robson  
Hannah Rose



William Shippam  
Patrick Thorburn  
Stuart Wade

#### Weston Area Health NHS Trust

Donna Cotterill  
Alex Dewar  
Guru Hosdurga\*  
Rik Marsden  
Ed Mew<sup>f</sup>  
Vivienne Pixton  
Glenn Saunders

#### Wirral University Teaching Hospital NHS Foundation Trust

Sharon Acheson  
Laura Bubb  
Matthew Gwinnutt  
Amy Hill  
Neil Oakes  
Suresh Singaravelu\*

#### Worcestershire Acute Hospitals NHS Trust

Kate Blyth  
Karen Faulkner  
Emily Johnson<sup>i</sup>  
Ravindra Mallavalli  
Christopher Mowatt\*<sup>i</sup>  
Cindy Persad\*<sup>i</sup>  
Emma Plunkett  
Alag Raajkumar  
Meghna Sharma  
Naginder Singh

#### Wrightington, Wigan and Leigh NHS Foundation Trust

John Barrett  
Simon Bluhm  
Maria Brereton<sup>c</sup>

Paul Andrew Damon Clements\*  
Joanne Farnworth  
Linzi Heaton  
Diane Heaton  
Julie Melville  
Valerie Parkinson  
Bryony Patrick  
Jessica Sykes  
Tracey Taylor

#### Wye Valley NHS Trust

Matthew Creed  
Joseph Hayward  
Richard Hodgson\*  
Aled Morgan

#### Yeovil District Hospital NHS Foundation Trust

Marmar Hty<sup>n</sup><sup>f</sup>  
Agnieszka Kubisz-Pudelko\*  
Ian Taylor<sup>f</sup>

#### York Teaching Hospital NHS Foundation Trust

Ramesh Ananthmanohar  
Jessica Bowen  
Lynne Brown  
Andrew Chamberlain  
Ben Chandler\*  
Kerry Deighton  
Simon Dyer  
Naomi Fleming<sup>a</sup>  
Muthuraj Kanakaraj\*  
Andrew McDonald<sup>a</sup>  
Eusebius U. Nworah  
Altaf Hassan Sultanpori  
Emma Temlett  
James Walkington  
Samantha Warnakulasuriya

Handling editor: Hugh Hemmings
